# **Robust neural control of virtual locomotion enabled by a novel decoding strategy**

Karen E Schroeder\*<sup>1,2</sup>, Sean M Perkins\*<sup>2,3</sup>, Qi Wang<sup>3</sup>, & Mark M Churchland<sup>1,2,4,5, †</sup>

\* Equal contribution

<sup>1</sup>Department of Neuroscience, Columbia University Medical Center, New York, NY

<sup>2</sup>Zuckerman Institute, Columbia University, New York, NY

<sup>3</sup>Department of Biomedical Engineering, Columbia University, New York, NY

<sup>4</sup>Kavli Institute for Brain Science, Columbia University Medical Center, New York, NY

<sup>5</sup>Grossman Center for the Statistics of Mind, Columbia University, New York, NY

† Correspondence to: [mc3502@columbia.edu](mailto:mc3502@columbia.edu)

## 1 **Abstract**

2 Brain-machine interfaces (BMIs) for reaching have enjoyed continued performance  
3 improvements. Yet there remains significant need for locomotor BMIs (e.g., for wheelchair  
4 control), which could potentially benefit a much larger patient population. Fewer studies have  
5 addressed this need, and the most effective approach remains undetermined. Here, we develop  
6 a locomotor BMI based on cortical activity as monkeys cycle a hand-held pedal to progress  
7 along a virtual track. Unlike most reach-based BMIs, we did not directly map neural states to  
8 commanded velocity or position. Instead, we leveraged features of the neural population  
9 response that were robust during rhythmic cycling. These included an overall shift in neural  
10 state when moving, and rotational trajectories with direction-specific paths. We used nonlinear  
11 means to infer kinematics from these features. Online BMI-control success rates approached  
12 those during manual control. Our results illustrate that different use-cases can require very  
13 different approaches to guiding a prosthetic via neural activity.

## 14 Introduction

15 Brain-machine interfaces (BMIs) interpret neural activity and provide control signals to external  
16 devices such as computers and prosthetic limbs. Intracortical BMIs for reach-like tasks have  
17 proved successful in primates and human clinical trials<sup>1-8</sup>. More widespread use appears  
18 imminent. Yet at the same time, there exist non-reach-like movements whose restoration is  
19 valuable to patients. For example, many patients could benefit from a BMI that controls  
20 locomotion through their environment (e.g., movement of a wheelchair). Recent work has  
21 demonstrated that this is feasible<sup>9,10</sup>. While locomotor BMIs can be guided by reach-inspired  
22 decoding approaches, other viable strategies exist and remain unexplored. For example, it may  
23 be more natural or robust to decode locomotor commands from continuous rhythmic neural  
24 activity. The specific case of locomotor BMIs highlights a broader issue: a focus on reaching and  
25 grasping has produced state-of-the-art decode algorithms that may not generalize well to non-  
26 reaching applications.

27 The early success of reach-based BMIs<sup>11-16</sup> was built upon a decoding strategy that sought to  
28 invert the ostensible cortical encoding of kinematic variables such as hand velocity / direction.  
29 Multiple lines of evidence now argue against the hypothesis that activity in motor cortex  
30 literally encodes kinematic variables<sup>17-22</sup>. Yet within the confines of a given task, robust  
31 correlations between neural activity and reach direction allow excellent BMI performance<sup>11-16</sup>.  
32 This core strategy has thus endured even as decoder sophistication has increased;  
33 improvements have derived largely from better estimating the neural state, thus improving the  
34 reach-velocity decode<sup>1,23-26</sup>. Indeed, this strategy is employed even when the hypothesis of literal  
35 kinematic encoding is explicitly rejected<sup>23</sup>. Such decoders are thus 'opportunistic': they seek to  
36 optimally leverage robust relationships between neural activity and behavior, regardless of  
37 whether those relationships are fundamental.

38 Opportunistic decode strategies possess two large advantages over biomimetic strategies  
39 (defined as strategies that attempt to decode the true output signals). First, opportunistic  
40 strategies do not require knowledge of the true relationship between neural activity and motor  
41 output, only an accurate characterization of activity for the behaviors one wishes to decode.  
42 Second, opportunistic strategies are potentially more noise robust than a truly biomimetic  
43 strategy. We recently argued that the dominant signals in motor cortex – i.e., those with the  
44 greatest influence on firing rates – exist to ensure noise-robust dynamics and do not encode any  
45 external quantity<sup>18</sup>. In contrast, neural signals that relate directly to outgoing commands (e.g.,  
46 downstream muscle activity) are small. Opportunistic strategies can leverage the dominant  
47 signals while biomimetic strategies are (by definition) limited to the smaller output signals. Yet

48 opportunistic decoding carries an obvious disadvantage: different tasks may necessitate very  
49 different decode strategies<sup>27</sup>.

50 Here we explore strategies appropriate for decoding virtual motion during a task in which  
51 monkeys rotate a hand-held pedal to move along a virtual track. Rather than emulate natural  
52 locomotion, this cycling task provides a view of cortical activity during a rhythmic voluntary  
53 movement. The resulting rhythmic neural responses represent a class of activity with which a  
54 patient might wish to control prosthetic locomotion. In agreement with recent results, neural  
55 population activity during cycling differed from that during reaching in fundamental ways. It  
56 was not simply that activity was sustained rather than transient. More critically, ‘directional’  
57 signals related to kinematics (hand velocity or position) were only weakly reflected in neural  
58 firing rates. Signals related to muscle activity were of similarly small magnitude.

59 Thus, rather than directly map neural activity to decoded limb kinematics, we sought to  
60 leverage features of the neural response that had robust (but not necessarily linear)  
61 relationships with the variable we most wished to decode: self-motion through the  
62 environment. We identified three such features. The first was a translation of the neural state  
63 that rapidly and robustly indicated whether the monkey was moving. The second was an  
64 elliptical neural-trajectory while cycling. That trajectory did not reverse with cycling direction  
65 (as would a representation of hand velocity), but instead occupied direction-dependent  
66 dimensions. As a result, the direction and magnitude of self-motion could be estimated by  
67 comparing the angular momentum of the neural state between pairs of dimensions. This feature  
68 was robust during ongoing cycling but not at movement initiation. We thus leveraged a third  
69 feature: at movement initiation, neural activity corresponding to forward and backward cycling  
70 was briefly linearly separable.

71 A decoder that leveraged these dominant features provided excellent online control of virtual  
72 locomotion. Success rates and acquisition times were very close to those achieved under manual  
73 control. Almost no training or adaptation time was needed; the low-latency and accuracy of the  
74 decoder were such that monkeys appeared to barely notice transitions from manual control to  
75 BMI control. These results demonstrate the feasibility of BMI locomotion based on rhythmic  
76 neural activity. More broadly, they establish that opportunistic decode strategies can work well  
77 in non-reach-based scenarios, but that new applications require novel decode approaches that  
78 respect the dominant structure of neural activity.

79

80

## 81 **Results**

### 82 *Behavior*

83 We trained two monkeys (G and E) to rotate a hand-held pedal to move through a virtual  
84 environment (**Fig. 1**). All motion was along a linear track – no steering was necessary.  
85 Consistent with this, a single pedal was cycled with the right arm only. Our goal when  
86 decoding was to reconstruct the virtual motion produced by that single pedal. On each trial, a  
87 target appeared in the distance. To acquire that target, monkeys produced virtual velocity in  
88 proportion to the rotational velocity of the pedal. The color of the environment (lush and green  
89 versus desert-like and tan) instructed cycling direction. When the environment was green (**Fig.**  
90 **1a, left**) forward virtual motion was produced by cycling ‘forward’ (i.e., with the hand moving  
91 away from the body at the top of the cycle). When the environment was tan (**Fig. 1a, right**)  
92 forward virtual motion was produced by cycling ‘backward’ (the hand moving toward the  
93 body at the top of the cycle). Cycling in the wrong direction produced motion away from the  
94 target. Trials were presented in blocks of forward or backward trials. Within each block, targets  
95 were separated by a randomized distance of 2, 4 or 7 cycles. Acquisition of a target was  
96 achieved by stopping and remaining stationary ‘on top’ of the virtual target for a specified time.  
97 Reward was then given and the next target appeared.

98 Monkeys performed the task well, moving swiftly between targets, stopping accurately on each  
99 target, and remaining stationary until the next target was shown. Monkeys cycled at a pace that  
100 yielded nearly linear progress through the virtual environment (**Fig. 1b**). Although not  
101 instructed to cycle at any particular angular velocity, monkeys adopted a brisk ~2 Hz rhythm  
102 (**Fig. 1c**). Small ripples in angular velocity were present during steady-state cycling; when  
103 cycling with one hand it is natural for velocity to increase on the downstroke and decrease on  
104 the upstroke. Success rates were high, exceeding 95% in every session (failures typically  
105 involved over- or under-shooting the target location). This excellent performance under manual  
106 control provides a stringent bar by which to judge performance under BMI control.

107 BMI control was introduced after monkeys were adept at performing the task under manual  
108 control. Task structure and the parameters for success were unchanged under BMI control, and  
109 no cue was given regarding the change from manual to BMI control. The switch to BMI control  
110 was made at the beginning of the session, after completion of a block of manual-control trials  
111 (25 forward and 25 backward 7-cycle trials). These manual-control trials were used to train the  
112 decoder. The switch was then made to BMI control for the remainder of the session. For monkey  
113 G, we occasionally included blocks of manual-control trials later in the session to allow

114 comparison between BMI and manual performance. For Monkey E we used separate  
115 (interleaved) sessions to assess manual-control performance.

116 During both BMI control and manual control, the monkey's ipsilateral (non-cycling) arm was  
117 restrained. The contralateral (cycling) arm was never restrained. We intentionally did not  
118 dissuade the monkey from continuing to physically cycle during BMI control. Indeed, our goal  
119 was that the transition to BMI control would be sufficiently seamless to be unnoticed by the  
120 monkey, such that he would still believe that he was in manual control. An advantage of this  
121 strategy is that we are decoding neural activity when the subject attempts to actually move, as a  
122 patient presumably would. Had we insisted the arm remain stationary, monkeys would have  
123 needed to actively avoid patterns of neural activity that drive movement – something a patient  
124 would not have to do. Allowing the monkey to continue to move normally allowed us to  
125 extensively quantify the performance of our decoder by comparing decoded with intended (i.e.,  
126 actual) movement. This is often not possible when using other designs. For example, in  
127 Rajangam et. al.<sup>9</sup>, performance could only be assessed via indirect measures (such as time to  
128 target) because what the monkey was actually intending to do at each moment was unclear. We  
129 considered these advantages to outweigh a potential concern: a decoder could potentially  
130 'cheat' by primarily leveraging activity driven by proprioceptive feedback (which would not be  
131 present in a paralyzed patient). This is unlikely to be a large concern. Recordings were made  
132 from motor cortex, where robust neural responses precede movement onset. Furthermore, we  
133 have documented that motor cortex population activity during cycling is quite different from  
134 that within the proprioceptive region of primary somatosensory cortex<sup>18</sup>. Thus, while  
135 proprioceptive activity is certainly present in motor cortex<sup>28-31</sup> (especially during  
136 perturbations<sup>32</sup>) the dominant features of M1 activity, described below, are unlikely to be  
137 primarily proprioceptive.

138 Given our use of healthy animals, we stress that the goal of the present study is to determine  
139 how the dominant structure of neural activity can be leveraged for accurate prosthetic decode.  
140 This follows the successful strategy of BMI studies that leveraged the known structure of  
141 activity during reaching<sup>11,23</sup>. Of course, the nature of the training data used to specify decode  
142 parameters (e.g., the neural dimensions to be used) will necessarily be different for a healthy  
143 animal that cannot understand verbal instructions and an impaired human that can. We thus  
144 stress that our goal is to determine a robust and successful decode strategy that works in real  
145 time during closed-loop performance. We do not attempt to determine the best approach to  
146 parameter specification, which in a patient would necessarily involve intended or imagined  
147 movement.

## 148 *Neural activity and decoding strategy*

149 We recorded motor cortical activity using 96-channel Utah arrays. For monkey G, one array was  
150 implanted in primary motor cortex (M1) and a second in dorsal premotor cortex (PMd). For  
151 monkey E, a single array was implanted in M1. For each channel we recorded times when the  
152 voltage crossed a threshold. Threshold crossings typically reflected individual spikes from a  
153 small handful of neurons (a neural ‘unit’). Spikes from individual neurons could be clearly seen  
154 on many channels, but no attempt was made to spike-sort, as the benefit of doing so is typically  
155 modest when controlling a prosthetic device<sup>33</sup>. Unit activity was strongly modulated during  
156 cycling (**Fig. 1d**). The phase, magnitude, and temporal pattern of activity depended on whether  
157 cycling was forward (*green* traces) or backward (*red* traces). A key question is how these unit-  
158 level features translate into population-level features that might be leveraged to estimate  
159 intended motion through the virtual environment.

160 In traditional decoding approaches (**Fig. 2a, top**) neural activity is hypothesized (usefully if not  
161 literally) to encode kinematic signals, which can be decoded by inverting the encoding scheme.  
162 Although nonlinear methods (including variations of Kalman filtering) are often used to  
163 estimate the neural state, the final conversion to a kinematic command is typically linear or  
164 roughly so. To explore kinematic encoding in the present task, we used linear regression to  
165 identify neural dimensions where activity correlated well with kinematics (including hand  
166 velocity and position). Regression was performed using single trials. Use of single trials  
167 provides a large quantity of training data and is implicitly regularizing: regression must find  
168 signals that are robust in the face of single-trial spiking variability. The regression weights for a  
169 given kinematic parameter define a neural dimension where activity correlates strongly with  
170 that parameter. We computed the neural variance captured by each such dimension. Variance  
171 captured was computed using trial-averaged data, to ensure that values were not diluted by  
172 noise. Despite this, the neural dimensions that best captured kinematic signals captured little  
173 population response variance (**Fig. 2b**, green bars). This was also true of neural dimensions that  
174 captured muscle activity (**Fig. 2b**, yellow bar). This was initially surprising: single-neuron  
175 responses were robustly sinusoidally modulated, as were many kinematic variables. Yet  
176 sinusoidal response features were often superimposed upon other response features (e.g.,  
177 overall shifts in rate when moving versus not moving). Sinusoidal features also did not display  
178 phase relationships, across forward and backward cycling, that were consistent with kinematic  
179 encoding<sup>18</sup>. As a result, the dimensions where activity correlated strongly with kinematics  
180 captured relatively little response variance.

181 Low-variance signals are a poor candidate for decoding intended action; they are likely to be  
182 non-robust with respect to multiple challenges. Some of these challenges (e.g., spiking noise)  
183 can be anticipated and estimated in advance, but others cannot. They include recording  
184 instabilities, changes in strategy or behavior with time, and (outside the laboratory setting)  
185 external sources of noise or variability. Given these challenges, it is worth stressing that there  
186 were two practical reasons why reach-focused BMIs leveraged signals that correlate with hand  
187 velocity. First, such signals are high-variance during reaching – so much so that M1 responses  
188 have often been summarized in terms of a preferred direction<sup>34,35</sup>. Second, movement direction /  
189 velocity are the variables one wishes to decode during reaching. In the present case neither  
190 motivation holds. Signals related to hand kinematics are low-variance, and we most wish to  
191 decode self-motion through the virtual environment. This suggests an alternative strategy (**Fig.**  
192 **2a, bottom**): identifying neural response features that are both robust (high-variance) and relate  
193 reliably to the presence and direction of self-motion.

194 To pursue this strategy, we considered three sets of high-variance dimensions. The first set  
195 included four ‘rotational dimensions’ (two each for forward and backward cycling) which  
196 captured elliptical trajectories present during steady-state cycling<sup>18</sup>. The second set included a  
197 single ‘moving-sensitive’ dimension, in which the neural state distinguished whether the  
198 monkey was stopped or moving regardless of movement direction<sup>36</sup>. The third set was a triplet  
199 of ‘initial-direction’ dimensions. In these dimensions, cycling direction could be transiently but  
200 readily distinguished in the moments after cycling began.

201 In subsequent sections we document the specific features present in these high-variance  
202 dimensions. Here we concentrate on the finding that the space spanned by these eight  
203 dimensions captured  $70.9\% \pm 2.3\%$  of the firing-rate variance (**Fig. 2c**). This was only modestly  
204 less than that captured by the top eight PCs (which capture the most variance possible), and  
205 much more than that captured by spaces spanned by dimensions where activity correlated with  
206 kinematics and/or muscle activity (**Fig. 2b**). We thus based our BMI decode entirely on activity  
207 in these eight high-variance dimensions. Before describing how this was accomplished, we  
208 document the resulting performance.

### 209 *Performance*

210 Monkeys performed the task very well under closed-loop BMI control (**Fig. 3** and **Supp. Movie**  
211 **1**). Monkeys continued to cycle as normal, presumably not realizing that the pedal had been  
212 disconnected from the control system. The illusion that the pedal still controlled the task was  
213 supported by a high similarity between decoded virtual velocity and intended virtual velocity  
214 (i.e., what would have been produced by the pedal were it still controlling the task). The cross-



215 correlation between these peaked at  $0.93 \pm .02$  and  $0.81 \pm .03$  (monkey G and E, mean  $\pm$  SD) at a  
216 short lag:  $76 \pm 4$  ms and  $102 \pm 7$  ms (**Fig. 3a**). That illusion was also aided by a low rate of false  
217 starts; it was exceedingly rare for decoded motion to be non-zero when the monkey was  
218 attempting to remain stationary on top of a target. False starts occurred on 0.29% and 0.09% of  
219 trials (monkeys G and E), yielding an average of 1.9 and 0.12 occurrences per day. This is  
220 notable because combatting unintended movement is a key challenge for BMI decoding<sup>2,37,38</sup>.  
221 The above features – high correlation with intended movement, low latency, and few false starts  
222 – led to near-normal performance under BMI control (**Fig. 3b,c**). Success rates under BMI  
223 control (**Fig. 3d**, *magenta symbols*) were almost as high as under manual control (*open symbols*),  
224 and the time to move from target to target was only slightly longer under BMI control (**Fig. 3e**).

225 The only respect in which BMI control suffered noticeably was accuracy in stopping on the  
226 middle of the target. Under manual control, monkeys stopped very close to the target center  
227 (**Fig. 3f**, *gray histogram*), which always corresponded to the ‘pedal-straight-down’ position.  
228 Stopping was less accurate under BMI control (*magenta histogram*). This was partly due to the  
229 fact that because virtual motion was swift, even small errors in decoded stopping time become  
230 relevant: e.g., a 100 ms error corresponds to  $\sim 0.2$  cycles of physical motion. The average  
231 standard deviation of decoded stopping time (relative to actual stopping time) was 133  
232 (monkey G) and 99 ms (monkey E). Increased stopping error in BMI-control trials was also due  
233 to an incidental advantage of manual control: the target center was aligned with the pedal-  
234 straight-down position, a fact which monkeys leveraged to stop very accurately in that position.  
235 This strategy was not available during BMI control because the correct time to stop rarely  
236 aligned perfectly with the pedal-straight-down position (this occurred only if decoded and  
237 intended virtual velocity matched perfectly when averaged across the cycling bout).

238 Performance was overall modestly better for monkey G versus E. This was likely due to the  
239 implantation of two arrays rather than one. Work ethic may also have been a factor; monkey E  
240 performed fewer trials under both BMI and manual control. Still, both monkeys could use the  
241 BMI successfully starting on the first day, with success rates of 0.87 and 0.74 (monkey G and E).  
242 Monkey G’s performance rapidly approached his manual-control success rate within a few  
243 sessions. Monkey E’s performance also improved quickly, although his manual-control and  
244 BMI-control success rates were mostly lower than Monkey G’s. The last five sessions involved  
245 BMI success rates of 0.97 and 0.96 for the two monkeys. This compares favorably with the  
246 overall averages of 0.98 and 0.95 under manual control. Although this performance  
247 improvement with time may relate to adaptation, the more likely explanation is simply that  
248 monkeys learned to not be annoyed or discouraged by the small differences in decoded and  
249 intended velocity.

## 250 *State machine*

251 The performance documented above was achieved using a state-dependent decode (**Fig. 4**).  
252 Features of the neural activity (described more fully in subsequent sections) determined state  
253 transitions and what was decoded in each state. Briefly, state transitions were governed by  
254 activity in the moving-sensitive dimension, which was translated into a probability of moving,  
255  $p_{move}$ . If  $p_{move}$  was low, the STOP state was active and decoded virtual velocity was zero. When  
256  $p_{move}$  became high, the INIT state was entered but decoded velocity remained zero. After 175  
257 ms, the EARLY state was entered and velocity was decoded using the initial-direction  
258 dimensions. After an additional 200 ms, the STEADY state was entered and virtual velocity  
259 depended only on the neural state in the rotational dimensions. Decoded velocity was filtered  
260 to smooth fluctuations during STEADY.

261 Values of  $p_{move} < 0.1$  always produced a transition back to STOP. This typically occurred from  
262 STEADY to STOP, as the movement was successfully ending. However, it could also occur from  
263 the other two states. This was especially helpful if  $p_{move}$  became high very briefly (and  
264 presumably erroneously). In such cases the state could transition from INIT back to STOP with  
265 the decoded velocity never departing from zero. Below we describe how virtual velocity was  
266 estimated while in STEADY, how  $p_{move}$  was derived, and how we decoded the early direction  
267 of movement during EARLY.

## 268 *Direction of steady-state movement inferred from rotational structure*

269 The dominant feature of the neural response during steady-state cycling was a repeating  
270 elliptical trajectory<sup>18</sup>. Our decoder leveraged the fact that forward-cycling and backward-cycling  
271 trajectories occurred in non-identical dimensions. We employed an optimization procedure to  
272 find a two-dimensional ‘forward plane’ that maximized the size of the forward trajectory  
273 relative to the backward trajectory. We similarly found an analogous ‘backward plane’. These  
274 planes were identified based on trial-averaged responses from the 50 trials of training data  
275 collected under manual control (**Fig. 5a**). With the aid of filtering (*Methods*), these planes  
276 continued to capture rotational features on individual trials (**Fig. 5b**). Although forward and  
277 backward trajectories were not orthogonal to one another, the above procedure was still able to  
278 find planes where strongly elliptical trajectories were present for only one cycling direction.

279 A common strategy for reaching prostheses is to linearly transform the neural state into a hand-  
280 velocity command; e.g. a state consistently to the right of zero would result in a consistently  
281 high rightwards velocity. In a given plane (e.g., backwards) the neural state traces a circle, and a  
282 plot of horizontal versus vertical hand velocity would also trace a circle. However, it would not

283 be desirable to attempt to directly decode velocity. Not only would this require somehow  
284 choosing between planes, but a neural state consistently to the right of zero should not result in  
285 a consistent decode of rightwards hand velocity. A decode of hand position would be  
286 somewhat more natural but still awkward (there are four dimensions rather than two, and  
287 positions near zero are difficult to interpret). We thus chose the strategy of comparing angular  
288 momentum (the cross product of the state vector with its derivative) between the two planes.  
289 When moving backward (first three cycling bouts in **Fig. 5c**) angular momentum was sizeable in  
290 the backward plane (*dark blue*) but not the forward plane (*bright blue*). The opposite was true  
291 when moving forward (subsequent three bouts).

292 Based on training data, we considered the joint distribution of forward-plane and backward-  
293 plane angular momentum. We computed distributions when stopped (**Fig. 5d**, *orange*), when  
294 cycling forward (*green*) and when cycling backward (*red*). These distributions overlapped little,  
295 and we fit a Gaussian to each. During BMI control, we computed the likelihood of the observed  
296 angular momentums under each of the three distributions. If likelihood under the stopped  
297 distribution was high, decoded velocity was zero. Otherwise, decoded velocity was determined  
298 by the relative likelihoods under the forward and backward distributions. These likelihoods  
299 were converted into a virtual velocity that was maximal when one likelihood was much higher  
300 (which was typically the case) and slower when likelihoods were more similar. The maximum  
301 decoded virtual velocity was set to approximate the typical virtual velocity under manual  
302 control, when cycling at ~2 Hz.

303 The above steps were performed when in the STEADY state. Distributions of decoded velocity  
304 under BMI control (**Fig. 5e**, *bottom*) were similar to the distributions of velocity that would have  
305 resulted were the pedal still operative (**Fig. 5e**, *top*). Importantly, distributions overlapped very  
306 little; the direction of decoded motion was almost always correct. Decoded velocity was near  
307 maximal at most times, especially for monkey G. High accuracy and brisk velocities were  
308 responsible for the ability to move between targets almost as rapidly under BMI control as  
309 under manual control.

### 310 *Inferring the probability of moving*

311 Decoders that directly translate neural state to cursor velocity have historically had difficulty  
312 remaining stationary when there is no intended movement. The ability to do so is of even  
313 greater importance for a locomotor prosthetic. To meet this challenge, we adopted the strategy  
314 of a state machine with distinct stopped and moving states<sup>37-39</sup>. Transitions between these states  
315 were governed by a probability of moving,  $p_{move}$ , derived from the neural state in the moving-  
316 sensitive dimension.

317 We identified the moving-sensitive dimension by applying linear discriminant analysis to the 50  
318 training-data trials, and finding the direction that best discriminated whether the monkey was  
319 moving versus stopped. Projecting trial-averaged data onto that dimension (**Fig. 6a**) revealed  
320 that activity transitioned suddenly from low to high just before movement onset, and back to  
321 low around the time movement ended. This pattern was remarkably similar regardless of  
322 cycling direction (*red* and *green* traces largely overlap). Activity in this dimension behaved  
323 similarly for single trials (**Fig. 6b**).

324 We used a Hidden Markov Model (HMM)<sup>37,38</sup> to estimate  $p_{move}$ , which allows the current  
325 estimate to depend on all prior observations. Because those observations must be independent,  
326 we did not use filtered rates (which were used for all other aspects of the decode) but instead  
327 considered spike counts in non-overlapping bins, projected onto the moving-sensitive  
328 dimension. Figure 6c plots the resulting distributions when stopped (*orange*) and moving (*blue*).  
329 These overlapped modestly, a result of the narrow (10 ms) bin. The estimate of  $p_{move}$  is robust  
330 to this overlap because the HMM leverages the full history of spike counts; it can ignore brief  
331 weak evidence for moving while still transitioning swiftly given strong evidence. During BMI  
332 control,  $p_{move}$  (**Fig. 6d**, *blue*) was near typically unity during intended movement (i.e., when the  
333 monkey was actually cycling, *black*) and near zero otherwise.

334 State transitions were determined by  $p_{move}$  (**Fig. 3**). Entering a state that produced virtual  
335 movement (EARLY or STEADY) required that  $p_{move}$  exceed 0.9 and remain consistently above  
336 0.1 for 175 ms. This conservative strategy led to a very low rate of false starts (~2 per day for  
337 monkey G and ~1 every ten days for monkey E). The transition to EARLY (**Fig. 6d**, left edge of  
338 *gray regions*) occurred on average 117 and 194 ms after physical movement onset (monkeys G  
339 and E). Trial-to-trial variability around these mean values was modest: standard deviations  
340 were 93 and 138 ms (computed within session and averaged across sessions). As discussed  
341 above, estimated stopping time (when  $p_{move}$  dropped below 0.1) was also decoded with only  
342 modest trial-to-trial variability.

### 343 *Inferring initial movement direction*

344 Angular momentum of the neural state in the forward and backward planes became substantial  
345 a few hundred milliseconds after  $p_{move}$  became high. Thus, the EARLY state became active  
346 before the direction of movement could be inferred from the elliptical trajectories. To overcome  
347 this problem, we identified three dimensions in which the neural state, around the time of  
348 movement onset, distinguished between forward and backward movement. The neural state in  
349 these dimensions (two of which are shown) differed between forward and backward

350 movements (*green* and *red* traces) both in the average response (**Fig. 7a**) and on individual trials  
351 (**Fig. 7b**). This difference began to grow just prior to physical movement onset (*dark portion* of  
352 trajectory shows -200 to +175 ms relative to detected movement onset) and became less  
353 prominent later in the movement (*light portion* of trajectory). We found these dimensions by  
354 performing PCA on training data (*Methods*). For each of the 50 training trials, we considered the  
355 neural state in these dimensions, measured 175 ms after decoded movement onset. We fit  
356 Gaussian distributions separately for forward (**Fig. 7c**, *green*) and backward (*red*) trials. These  
357 had largely non-overlapping distributions.

358 During BMI control, upon transition from INIT to EARLY, we computed the likelihood of the  
359 neural state under each distribution. A simple winner-take-all computation determined the  
360 direction of virtual velocity during the EARLY state. The inference of movement direction  
361 during EARLY was correct on 94% and 82% of trials (monkeys G and E). After 200 ms, the  
362 STEADY state was entered and virtual velocity was controlled thereafter by activity in the  
363 rotational dimensions. **Figure 7d** illustrates moments (*colored regions*) where the EARLY state  
364 was active and the above strategy was used to decode virtual motion (physical pedal velocity is  
365 shown for reference). These moments were brief, and had a very modest effect on the overall  
366 time to reach the target. However, we still employed this strategy because our goal was to build  
367 a BMI decode that closely tracked intended movement and felt responsive to the subject.

### 368 *Speed control*

369 The excellent performance of the decoder was aided by the relative simplicity of behavior: when  
370 monkeys moved, they did so at a stereotyped speed. This allowed us to concentrate on building  
371 a decode algorithm that decoded intended direction with accurate timing, and remained  
372 stationary if movement was not intended. However, that decode provided only limited control  
373 of movement speed. An obvious extension is to allow finer-grained speed control. This would  
374 presumably be desired by users of a locomotor prosthetic. Furthermore, speed control provides  
375 one possible way of steering: e.g., by decoding the relative intensity of intended movement on  
376 the two sides of the body. While we do not attempt that here, we still considered it important to  
377 determine whether the neural features we identified could support speed control.

378 That assessment required a task where speed control is necessary for success. We thus trained  
379 one monkey to track various speed profiles as he progressed through the virtual environment.  
380 Two floating targets were rendered in the foreground as the monkey cycled. The distance  
381 between them reflected the difference between actual and instructed speed. Obtaining juice  
382 required aligning the two floating targets while progressing towards a final target, on which he  
383 stopped to obtain additional reward. The task was divided into trials, each of which required

384 moving a distance equivalent to twenty cycles under manual control. We used eight trial-types,  
385 four each for forward and backward cycling. Two of these employed a constant target speed  
386 (equivalent to 1 or 2 Hz cycling) and two involved a ramping speed (from 1 Hz to 2 Hz or vice  
387 versa). As above, the decoder was trained based on a small number of manual-control trials  
388 performed at the beginning of each session. Blocks of manual-control trials were also included  
389 for comparisons between manual and BMI-based performance.

390 Our decode strategy was largely preserved from that described above. However, we used a  
391 modified state machine (**Supp. Fig. 2**) and a slightly different algorithm for transforming  
392 rotations of the neural state into decoded virtual velocity. Direction was determined based on  
393 which distribution (forward or backward) produced the higher likelihood of observing the  
394 measured angular momentums (as in **Fig. 5d**). Once that choice was made, speed was  
395 determined by the angular velocity of the neural state in that plane. Thus, faster rotational  
396 trajectories led to faster decoded virtual velocity. We chose a scaling factor so that a given  
397 neural angular velocity produced the speed that would have been produced by physical cycling  
398 at that angular velocity. Neural angular velocity was exponentially filtered with a time constant  
399 of 500 ms. The filter memory was erased on entry into a movement state (EARLY or STEADY)  
400 from a stopped state (INIT or EXIT) to allow brisk movement onset (see *Methods*).

401 The above strategy allowed smooth BMI control of movement speed. In fact, it tended to give  
402 BMI control an intrinsic advantage over manual control. In manual control, the angular velocity  
403 of the pedal was naturally modulated within each cycle (being higher on the downstroke),  
404 resulting in a fluctuating virtual velocity. Such fluctuations mildly impaired the ability to match  
405 target speed under manual control. To allow a fair comparison, we thus also applied an  
406 exponential filter to virtual velocity under manual control. Filters were chosen separately for  
407 BMI ( $\tau = 500$  ms) and manual control ( $\tau = 1000$  ms) to maximize performance. This was done  
408 informally, in the earliest session, by lengthening the filter until success rate roughly plateaued.  
409 The filter then remained fixed for all further sessions.

410 Under BMI control, decoded virtual speed closely tracked instructed speed. This was true  
411 across trials with different constant speeds, and within trials where speed modulated with time  
412 (**Fig. 8a,b**). To compare BMI with manual control (which were performed on separate days) we  
413 considered all trials where the monkey completed the portion of the trial that required matching  
414 speed (87% of trials in arm control, and 79% in BMI control). The monkey was able to match  
415 instructed speed nearly as accurately under BMI control as under manual control. This was true  
416 judged both by time within the rewarded speed window (**Fig. 8c**) and by the error between  
417 virtual and instructed velocity (**Fig. 8d**).

## 418 Discussion

419 We have argued that the largest signals in motor cortex are not ‘representational’ – they do not  
420 encode variables but are instead essential for noise-robust dynamics. Those dynamics produce  
421 outgoing commands that *are* representational (they covary with the variables they control) but  
422 are low-variance. This perspective argues that decoders should not attempt to invert encoding  
423 unless a great many neurons can be recorded. Instead, decoders should opportunistically  
424 leverage whichever high-variance response features have a robust relationship with the  
425 variables one wishes to decode. In retrospect, traditional reach-based prosthetics can be seen as  
426 taking exactly this approach; during reaching there exist high-variance neural signals that  
427 correlate (linearly) with a projection of two-dimensional reach velocity onto a ‘preferred  
428 direction’. Similarly, decoding of muscle activity for prosthetic control<sup>6</sup> likely leverages signals  
429 that coincidentally but usefully correlate with muscle force during the task of interest.

430 During cycling, the neural signals that correlate strongly with hand position and velocity are  
431 low variance. Yet there exist different high-variance response features that possess robust  
432 relationships with intended movement. Those relationships may be nonlinear, but can  
433 nevertheless be decoded using straightforward means (e.g., computing angular momentum in  
434 state space). Doing so yielded BMI control that was sufficiently natural that monkeys appeared  
435 not to notice that the task was no longer under manual control. By most measures (success rate,  
436 time to target) performance under BMI control was remarkably close to that under manual  
437 control. The main limitation of BMI control was stopping accuracy. Although our algorithm  
438 detected stopping with ~ 0.1 second precision, even small discrepancies could lead to the target  
439 being over or undershot by a noticeable amount. A beneficial feature of our BMI decode is that  
440 it almost never produced movement when it was not intended. With rare exceptions, truly zero  
441 velocity was decoded when the monkey was intending to remain stopped on the target. We  
442 consider this a particularly important attribute of any locomotor-BMI algorithm, due to the  
443 potentially large consequences of unintended movement of the whole body.

444 The present approach relates to recent studies that modeled neural dynamics to improve  
445 online<sup>23</sup> or offline<sup>24,40,41</sup> decodes of movement kinematics. A key insight of those studies is that  
446 signals that do not correlate directly with kinematics can be used to infer those that do. For  
447 linear decoding, the value of given variable depends upon the neural state in one dimension:  
448 the dimension defined by the regression weights. Nevertheless, inferring the neural state in that  
449 dimension may benefit from a dynamical model that spans multiple dimensions. Much like the  
450 present approach, this allows the decode to leverage features that are robust, even if they do not  
451 directly correlate with the kinematic parameters of interest. The present approach extends this

452 idea to situations where there may be no high-variance dimensions that can be linearly  
453 decoded, and/or where the most prominent features are not well-described by linear dynamics.

454 We had three motivations for developing a BMI algorithm for virtual locomotion. First, our  
455 recently developed cycling task naturally lends itself to this application. Second, BMI-controlled  
456 locomotion is likely to be desired by a large patient population (potentially much larger than  
457 the population that desires BMI-controlled cursors or robot arms). Third, prior work has  
458 demonstrated that BMI control of locomotion is viable<sup>9,10</sup>. In particular, Rajangam et al.<sup>9</sup>  
459 demonstrated BMI control of a physical wheelchair based on neural activity recorded from  
460 monkey motor and somatosensory cortex. Our work supports their conclusion that BMI-  
461 controlled locomotion is possible, and demonstrates the feasibility of an alternative decode  
462 strategy. Rajangam et al. employed a traditional decode strategy: linear filters transformed  
463 neural activity into the key variables: translational and angular velocity. That strategy allowed  
464 monkeys to navigate ~2 meters to a target (which had to be approached with an accuracy of +/-  
465 ~0.2 meters, or 10% of the distance traveled) in an average of 27-49 seconds (depending on the  
466 monkey and degree of practice). In our task, monkeys had to stop with similar relative  
467 accuracy: +/- 0.5 cycles, or 7% of the distance traveled for a seven-cycle movement. They  
468 traversed those seven cycles in ~4 seconds under BMI control (averages of 4.3 and 3.7 seconds  
469 for monkey G and E). While this is roughly tenfold faster, we stress that movement durations  
470 are not directly comparable between our task and theirs. Success requirements differed in  
471 multiple ways. For example, Rajangam et al. required that monkeys turn *en route* (which adds  
472 considerable challenge) but did not require them to stop on the target location. Yet while direct  
473 comparison is not possible, a tenfold improvement in time-to-target argues that non-traditional  
474 decode strategies can be effective and should be explored further.

475 An obvious limitation of the current experiments is that we did not explore strategies for  
476 steering, which would be essential to a real-world locomotor prosthetic. There exist multiple  
477 candidate strategies for enabling steering. Rajangam et al. used a Wiener filter to decode  
478 angular velocity of the body. While straightforward, this strategy appears to have had limited  
479 success: even during training, the  $R^2$  of their angular velocity decode was 0.16 and 0.12 for the  
480 two monkeys. During online performance, the considerable time to reach the target argues that  
481 steering was not accurate. One alternative strategy would be to apply our decode strategy  
482 bilaterally, and employ a comparison (e.g., between left and right cycling speed) to control  
483 angular velocity. Another strategy would be to control translational velocity using the strategies  
484 developed here, but use a reach-like decode for steering (rather like pedaling a bicycle while  
485 also steering). Which (if any) of these three strategies is preferable remains a question for future  
486 experiments.



487 For convenience, monkeys were trained to control the pedal with their forelimb (allowing them  
488 to be seated in a traditional primate chair) and we thus recorded from the forelimb region of  
489 motor cortex. Recordings during natural locomotion in monkeys reveal broadly similar signals  
490 in both the forelimb<sup>27</sup> and hindlimb<sup>42</sup> regions of motor cortex. These signals are dominated, as in  
491 our task, by elliptical neural trajectories during ongoing locomotion. It is thus likely that  
492 prosthetic locomotion could be driven by signals derived from either region.

493 Like many proof-of-concept prosthetic systems developed in primates<sup>1,16,43-45</sup>, decoder training  
494 depended on observations of neural activity under manual control. Whether this approach  
495 translates depends upon the assumption that useful patterns of neural activity will emerge  
496 when a paralyzed patient tries to move but can't. A number of existing studies indicate that  
497 motor cortex is active, in reasonably normal ways, when paralyzed patients attempt to move.  
498 Importantly, decode strategies based on a characterization of population activity during normal  
499 reaching in primates have provided successful directional control of a cursor in human  
500 patients<sup>1,2,43</sup>. The approach to specifying parameters was of course tailored to the needs of the  
501 patients, but the class of decoder did not need to be altered. It seems likely that the same will be  
502 true of rhythmic neural activity and decoding of intended movement. More broadly, a key point  
503 of the present study is that a fixed decode strategy is unlikely to work well across the different  
504 classes of movement that patients are likely to desire. Instead, decode strategies should leverage  
505 population-level response features that relate robustly to the variables one wishes to control.  
506 Such features are presumably present in paralyzed patients, and will almost certainly be task  
507 dependent.

508 Our results indicate that a nonlinear, yet relatively simple, decode strategy can afford excellent  
509 one-dimensional control of locomotion. Although other approaches remain possible<sup>46</sup>, our  
510 findings support the idea that cortical control of prosthetic locomotion is viable and should be  
511 explored further. More broadly, the present results argue that many of the decode strategies  
512 that proved effective for reach-based prostheses are unlikely to generalize across tasks. An  
513 alternative approach is to identify, for each task, the dominant features and determine how they  
514 might be usefully translated into decoded movement. While this approach abandons the elegant  
515 idea of inverting a literal encoding of kinematics, it opens up possibilities for improved  
516 prosthetic control across a variety of contexts.

## 517 **Methods**

### 518 *Subjects and primary task*

519 All procedures were approved by the Columbia University Institutional Animal Care and Use  
520 Committee. Subjects G and E were two adult male macaque monkeys (*Macaca mulatta*).  
521 Monkeys sat in a primate chair facing an LCD monitor (144 Hz refresh rate) that displayed a  
522 virtual environment generated by the Unity engine (Unity Technologies, San Francisco, CA).  
523 The head was restrained via a titanium surgical implant. While the monkey's left arm was  
524 comfortably restrained, the right arm grasped a hand pedal. Cloth tape was used to ensure  
525 consistent placement of the hand on the pedal. The pedal connected via a shaft to a motor  
526 (Applied Motion Products, Watsonville, CA), which contained a rotary encoder that measured  
527 the position of the pedal with a precision of 1/10,000 of the cycle. The motor was also used to  
528 apply forces to the pedal, endowing it with virtual mass and viscosity.

529 Manual-control sessions for the primary cycling task required that the monkey cycle the pedal  
530 in the instructed direction to move through the virtual environment, and stop on top of a  
531 lighted target to collect juice reward. The color of the landscape indicated whether cycling must  
532 be 'forward' (green landscape, the hand moved away from the body at the top of the cycle) or  
533 'backward' (tan landscape, the hand moved toward the body at the top of the cycle). There were  
534 6 total conditions, defined by cycling direction (forward or backward) and target distance (2, 4,  
535 or 7 cycles). Distance conditions were randomized within same-direction blocks (3 trials of each  
536 distance per block), and directional blocks were randomized over the course of each  
537 experiment. Trials began with the monkey stationary on a target. A second target appeared in  
538 the future. To obtain reward, the monkey had to cycle to that target, come to a halt 'on top' of it  
539 (in the first-person perspective of the task) and remain stationary for a hold period of 1000-1500  
540 ms (randomized). A trial was aborted without reward if the monkey began moving before  
541 target onset (or in the 170 ms after, which would indicate attempted anticipation), if the monkey  
542 moved past the target without stopping, or if the monkey moved while awaiting reward. The  
543 next trial began 100 ms after the variable hold period. Monkeys performed until they received  
544 enough liquid reward that they chose to desist. As their motivation waned, they would at times  
545 take short breaks. For both manual-control and BMI-control sessions, we discarded any trials in  
546 which monkeys made no attempt to initiate the trial, and did not count them as 'failed'. These  
547 trials occurred  $2 \pm 2$  times per session (mean and standard deviation, Monkey G, maximum 10)  
548 and  $3 \pm 3$  times per session (Monkey E, maximum 11).

549 In BMI control, trial parameters and failure conditions were the same as in manual control, for  
550 purposes of comparison. The only difference between manual and BMI control was that, in the  
551 latter, position in the virtual environment was controlled by the output of a decoder rather than  
552 the pedal. We did not prevent or discourage the monkey from cycling during BMI-control  
553 blocks, and he continued to do so as normal. In BMI control, monkey G performed an average  
554 of 654 trials/session over 20 sessions and monkey E performed an average of 137 trials/session  
555 over 17 sessions. Manual-control data for monkey G (average of 229 trials/session over 8  
556 sessions) were collected during sessions in which BMI-control data sets were also collected.

557 Manual-control sessions for monkey E (average of 231 trials/session over 5 sessions) were  
558 interleaved with BMI-control sessions on different days. For monkey G, an additional three  
559 manual-control sessions (189, 407, and 394 trials) were employed to record EMG, which was  
560 used for the variance captured analysis (**Fig. 2b,c**). We recorded from 5-7 muscles per session,  
561 yielding a total of 19 recordings. We made one or more recordings from the three heads of the  
562 *deltoid*, the lateral and long heads of *triceps brachii*, the *biceps brachii*, *trapezius*, and *latissimus*  
563 *dorsi*. These muscles were selected due to their clear activations during the cycling task.

#### 564 *Surgery and neural/muscle recordings*

565 Neural activity was recorded using chronic 96-channel Utah arrays (Blackrock Microsystems,  
566 Salt Lake City, UT), implanted in the left hemisphere using standard surgical techniques. In  
567 each monkey, an array was placed in the region of primary motor cortex (M1) corresponding to  
568 the upper arm. In monkey G, a second array was placed in dorsal premotor cortex (PMd), just  
569 anterior to the first array. Array locations were selected based on MRI scans and anatomical  
570 landmarks observed during surgery. Experiments were performed 1-8 months (monkey G) and  
571 3-4 months (monkey E) after surgical implantation. Neural responses both during the task and  
572 during palpation confirmed that arrays were in the proximal-arm region of cortex.

573 Electrode voltages were filtered (band-pass 0.3 Hz – 7.5 kHz) and digitized at 30 kHz using  
574 Digital Headstages, Digital Hubs, and Cerebus Neural Signal Processors from Blackrock  
575 Microsystems. Digitized voltages were high-pass filtered (250 Hz) and spike events were  
576 detected based on threshold crossings. Thresholds were set to between -4.5 and -3 times the  
577 RMS voltage on each channel, depending on the array quality on a given day. On most  
578 channels, threshold crossings included clear action-potential waveforms from one or more  
579 neurons, but no attempt was made to sort action potentials.

580 Intra-muscular EMG recordings were made using pairs of hook-wire electrodes inserted with 30  
581 mm x 27 gauge needles (Natus Neurology, Middleton, WI). Raw voltages were amplified and  
582 filtered (band-pass 10 Hz – 10 kHz) with ISO-DAM 8A modules (World Precision Instruments,  
583 Sarasota, FL), and digitized at 30 kHz with the Cerebus Neural Signal Processors. EMG was  
584 then digitally band-pass filtered (50 Hz – 5 kHz) prior to saving for offline analysis. Offline,  
585 EMG recordings were rectified, low-pass filtered by convolving with a Gaussian (standard  
586 deviation: 25 ms), downsampled to 1 kHz, and then fully normalized such that the maximum  
587 value achieved on each EMG channel was 1.

588 A real-time target computer (Speedgoat, Bern, CH) running Simulink Real-Time environment  
589 (MathWorks, Natick, MA) processed behavioral and neural data and controlled the decoder  
590 output in online experiments. It also streamed variables of interest to another computer that  
591 saved these variables for offline analysis. Stateflow charts were implemented in the Simulink  
592 model to control task state flow as well as the decoder state machine. Real-time control had  
593 millisecond precision.

594 Spike trains were causally converted to firing rates by convolving each spike with a beta kernel.  
595 The beta kernel was defined by temporally scaling a beta distribution (shape parameters:  $\alpha = 3$

596 and  $\beta = 5$ ) to be defined over the interval  $[0, 275]$  ms and normalizing the kernel such that the  
597 firing rates would be in units of spikes/second. The same filtering was applied for online  
598 decoding and offline analyses. Firing rates were also mean centered (subtracting the mean rate  
599 across all times and conditions) and normalized. During online decoding, the mean and  
600 normalization factor were values that had been computed from the training data. We used soft  
601 normalization<sup>18</sup>: the normalization factor was the firing rate range plus a constant (5 spikes/s).

#### 602 *Computing trial-averaged firing rates*

603 Analyses of BMI performance are based on real-time decoding during online performance, with  
604 no need to consider trial-averaged firing rates. However, we still wished to compute trial-  
605 averaged traces of neural activity and kinematics for two purposes. First, some aspects of  
606 decoder training benefited from analyzing trial-averaged firing rates. Second, we employ  
607 analyses that document basic features of single-neuron responses and of the population  
608 response (e.g., **Fig. 1d**, **Fig. 2**, **Fig. 5a**, **Fig. 6a**). These analyses benefit from the denoising that  
609 comes from computing a time-varying firing rate across many trials. Due to the nature of the  
610 task, trials could be quite long (up to 20 cycles in the speed-tracking task), rendering the  
611 traditional approach of aligning all trials to movement onset insufficient for preserving  
612 alignment across all subsequent cycles. It was thus necessary to modestly adjust the time-base  
613 of each individual trial (e.g., stretching time slightly for a trial where cycling was faster than  
614 typical). We employed two alignment methods. Method A is a simplified procedure that was  
615 used prior to parameter fitting when training the decoder before online BMI control. This  
616 method aligns only times during the movement. Method B is a more sophisticated alignment  
617 procedure that was utilized for all offline analyses. This method aligns the entire trial, including  
618 pre- and post-movement data. For visualization, conditions with the same target distance (e.g.,  
619 7 cycles), but different directions, were also aligned to the same time base. Critically, any data  
620 processing that relied on temporal structure was completed in the original, unstretched time  
621 base prior to alignment.

622 **Method A:** The world position for each trial resembles a ramp between movement onset and  
623 offset (**Fig. 1a**). First, we identify the portion of each trial starting  $\frac{1}{4}$  cycle into the movement  
624 and ending  $\frac{1}{4}$  cycle before the end of the movement. We fit a line to the world position in this  
625 period and then extend that line until it intercepts the starting and ending positions. The data  
626 between these two intercepts is considered the movement data for each trial and is extracted.  
627 This movement data is then uniformly stretched in time to match the average trial length for  
628 each trial's associated condition. This approach compresses slower than average movements  
629 and stretches faster than average movements within a condition, such that they can be averaged  
630 while still preserving many of the cycle-specific features of the data.

631 **Method B:** This method consists of a mild, non-uniform stretching of time in order to match  
632 each trial to a condition-specific template. For complete details, see Russo et al. 2018.<sup>18</sup>

#### 633 *Variance captured analysis*

634 Analysis of neural variance captured (**Fig. 2**) was based on successful manual-control trials from  
635 the three sessions with simultaneous neural and muscle recordings. We considered data from  
636 the full duration of each trial, including times before movement onset and after movement  
637 offset. We analyzed the variance captured by neural dimensions of three types. First, neural  
638 dimensions where activity correlated strongly with kinematic features. Second, neural  
639 dimensions where activity correlated strongly with muscle activity. Third, neural dimensions  
640 that captured robust ‘features’ leveraged by our decoder.

641 Dimensions of the third type (were found as detailed below in a dedicated section below.  
642 Dimensions of the first two types were found using the model  $z(r, t) = c + \mathbf{w}^\top \mathbf{y}(r, t)$ , where  
643  $z(r, t)$  is the kinematic or muscle variable at time  $t$  during trial  $r$ , and  $\mathbf{y}(r, t)$  is the  
644 corresponding  $N$ -dimensional vector of neural firing rates. The constant  $c$  and the column  
645 vector  $\mathbf{w}$  were found via regression. The vector  $\mathbf{w}$  defines a direction in neural space where  
646 activity correlates strongly with the variable  $z$ . We found multiple such vectors; e.g.  $\mathbf{w}_{x-vel}$  is a  
647 dimension where neural activity correlates with horizontal velocity and  $\mathbf{w}_{biceps}$  is a dimension  
648 where neural activity correlates with biceps activity. All such vectors were scaled to have unity  
649 norm before computing the neural variance captured by that dimension. Regression was based  
650 on single-trial responses because this was intrinsically regularizing. We wished to encourage  
651 regression to find high-variance dimensions if possible, and the use of single-trial data  
652 encouraged it to do so. Because filtering of neural activity introduces a net lag, this analysis  
653 naturally assumes a  $\sim 100$  ms lag between neural activity and the variables of interest. Results  
654 were extremely similar if we considered longer or shorter lags.

655 We wished to compute, for each dimension, the percentage of neural variance explained – i.e.,  
656 whether that dimension captured large or small signals. We were not interested in whether  
657 dimensions captured stochastic spiking variability, but in whether they captured large features  
658 that were reliable across trials. Thus, variance captured was always computed based on trial-  
659 averaged neural responses. We considered the matrix  $\bar{Y} \in \mathbb{R}^{N \times T}$  where  $T$  is the total number of  
660 time points across all conditions. Each row of  $\bar{Y}$  contains the trial-averaged firing rate of one  
661 neuron. We computed an  $N \times N$  covariance matrix  $\Sigma = \text{cov}(\bar{Y})$  by treating rows of  $\bar{Y}$  as random  
662 variables and columns as observations. The proportion of total neural variance captured by a  
663 given dimension,  $\mathbf{w}$ , is therefore:

$$664 \quad \frac{\mathbf{w}^\top \Sigma \mathbf{w}}{\text{tr}(\Sigma)}$$

665 Some analyses considered the variance captured by a subspace spanned by a set of dimensions.  
666 To do so we took the sum of the variance captured by orthonormal dimensions spanning that  
667 space.

### 668 *Identifying neural dimensions*

669 Although the response features leveraged by the decode algorithm are clearly visible in the top  
670 principal components of the data (when PCA is performed on the full trial-averaged time-series

671 of firing rates across conditions), we sought to choose neural dimensions that would cleanly  
672 isolate particular features. To this end, each feature was isolated using dedicated preprocessing  
673 and dimensionality reduction approaches.

674 We sought a moving-sensitive dimension, the projection onto which would allow an HMM to  
675 estimate the probability of moving,  $p_{move}$ , at each moment. To do so, we first computed binned  
676 spike-counts (10 ms for monkey G, 20 ms for monkey E) and applied a square-root transform to  
677 these counts as this has been shown to improve the Gaussian fit for Poisson data with small  
678 counts<sup>47</sup>. We then aggregated all of these square-rooted binned counts from the training set (25  
679 forward trials, 25 backward trials) and separated them into two classes based on pedaling  
680 speed: ‘moving’ (speed > 1 Hz) and ‘stopped’ (speed < .05 Hz). Samples that didn’t fall into  
681 either of these two classes were discarded. We applied linear discriminant analysis to these two  
682 labeled sets, which yielded a discriminating hyperplane that best separated the two classes. We  
683 defined the moving-sensitive dimension,  $\mathbf{w}_{move}$ , as the vector normal to this hyperplane.

684 In order to decode direction, we sought to isolate four neural dimensions that captured  
685 rotational trajectories during steady-state cycling. Spike time-series were filtered to yield firing  
686 rates (as described above), and then further high-pass filtered (2<sup>nd</sup> order Butterworth, cutoff  
687 frequency: 1 Hz). This removed drift or other low-frequency signals. Single-trial movement-  
688 period responses were then aligned (Method A) and averaged within conditions to generate  
689  $N \times T_c$  matrices  $\bar{Y}_f$  and  $\bar{Y}_b$ . We sought a 4-dimensional projection of these trial-averaged  
690 responses that would maximally capture rotational trajectories while segregating forward and  
691 backward data into different planes. Whereas the standard PCA cost function finds dimensions  
692 that maximize variance captured, we opted instead for a cost function that would maximize the  
693 difference in variance captured between the two conditions:

$$694 \quad J(W) = \text{tr}(W^T \Sigma_f W) - \text{tr}(W^T \Sigma_b W)$$

695 where  $\Sigma_f = \text{cov}(\bar{Y}_f)$ ,  $\Sigma_b = \text{cov}(\bar{Y}_b)$ ,  $W$  is constrained to be orthonormal. Note that this cost  
696 function will be maximized when the projection of the data captures a great deal of variance for  
697 forward trials and very little variance for backward trials. Conversely, this cost function will be  
698 minimized when the projection favors large variances for backward trials and small variances  
699 for forward trials. We thus chose to define our forward rotational plane by the 2D matrix  $W_f =$   
700  $\begin{bmatrix} \mathbf{w}_f^{(1)} & \mathbf{w}_f^{(2)} \end{bmatrix}$  that maximizes  $J(W)$  and our backward rotational plane by the 2D matrix  $W_b =$   
701  $\begin{bmatrix} \mathbf{w}_b^{(1)} & \mathbf{w}_b^{(2)} \end{bmatrix}$  that minimizes  $J(W)$ . An iterative optimization procedure was used to find  $W_f$  and  
702  $W_b$ ; full details of this in<sup>48</sup>.

703 To decode direction during the EARLY state, we found a set of initial-direction dimensions. We  
704 used activity in the moving-sensitive dimension to determine the time,  $t_{init}$ , at which the state  
705 machine would have entered the INIT state during online control. We then considered trial-  
706 averaged neural activity, for each condition, from  $t_{init}$  through  $t_{init} + 200$  ms. We applied PCA  
707 and retained the top three dimensions:  $\mathbf{w}_{dir}^{(1)}$ ,  $\mathbf{w}_{dir}^{(2)}$ , and  $\mathbf{w}_{dir}^{(3)}$ . Such dimensions capture how

708 activity evolves both across that timespan, and how it differs across forwards and backwards  
709 cycling conditions.

### 710 *Computing probability of moving ( $p_{move}$ )*

711 To compute  $p_{move}$  based on neural activity in the moving-sensitive dimension, an HMM was  
712 used to track two states: ‘moving’ or ‘stopped’<sup>38</sup>. Square-rooted spike counts in the training data  
713 were already separated into ‘moving’ and ‘stopped’ sets for the purposes of identifying  $w_{move}$ .  
714 We projected those counts onto  $w_{move}$  and a fit Gaussian distribution for each state. The  
715 probability,  $p_{move}$ , of being in the ‘moving’ state, given the entire sequence of current and  
716 previously observed square-rooted spike counts, was computed efficiently with a recursive  
717 algorithm that uses the state transition matrix

$$718 \quad \Phi = \begin{bmatrix} p_{move|move} & p_{move|stop} \\ p_{stop|move} & p_{stop|stop} \end{bmatrix}$$

719 and knowledge of the Gaussian distributions.  $\Phi$  encodes prior assumptions about the  
720 probability of transitioning from one state to the next at any given bin. We used a benchmark  
721 set of manual-control training data from each monkey to determine reasonable values for  $\Phi$ ,  
722 which were then used in all experiments. For monkey G, we set  $p_{move|stop} = .0001$  and  
723  $p_{stop|move} = .002$ ; for monkey E, we set  $p_{move|stop} = .0002$  and  $p_{stop|move} = .004$ . The value  
724  $p_{move}$  was used throughout the decoder state machine to control transitions between various  
725 states, effectively dictating the movement onset and offset behavior of the decoder (**Fig. 6d**).

### 726 *Computing steady-state direction and speed*

727 Projecting single-trial, high-pass filtered firing rates onto the rotational planes spanned by  $W_f$   
728 and  $W_b$  yielded trajectories that differed considerably between forward and backward  
729 conditions. To further denoise these state trajectories we applied a Kalman filter of the form

$$730 \quad x_t = Ax_{t-1} + q_t$$
$$731 \quad y_t = Cx_t + r_t$$

732 where  $q_t \in \mathcal{N}(0, Q)$ , and  $r_t \in \mathcal{N}(0, R)$ . In these equations,  $x_t$  represents the true underlying  
733 neural state in the rotational dimensions and  $y_t$  are the high-pass filtered firing rates, which we  
734 treat as noisy measurements of that underlying state. We chose to let our measurements be  
735 smooth firing rates, rather than use non-overlapping bins of spikes, for purely opportunistic  
736 reasons: it consistently yielded better performance by our decoder. The parameters of the  
737 Kalman filter were fit to the training data as follows:

$$738 \quad A = \bar{X}_2 \bar{X}_1^T (\bar{X}_1 X_1^T)^{-1}$$

$$739 \quad C = \begin{bmatrix} W_f^T \\ W_b^T \end{bmatrix}^\dagger$$

740 
$$Q = \text{cov}(\bar{X}_2 - A\bar{X}_1)$$

741 
$$R = \text{cov}(Y - C\bar{X})$$

742 where

743 
$$\bar{X}_1 = \begin{bmatrix} W_f^T \\ W_b^T \end{bmatrix} [\bar{Y}_f(:, 1:T_f - 1), \bar{Y}_b(:, 1:T_b - 1)]$$

744 
$$\bar{X}_2 = \begin{bmatrix} W_f^T \\ W_b^T \end{bmatrix} [\bar{Y}_f(:, 2:T_f), \bar{Y}_b(:, 2:T_b)]$$

745 
$$\bar{X} = \begin{bmatrix} W_f^T \\ W_b^T \end{bmatrix} [\bar{Y}_1, \bar{Y}_2, \dots, \bar{Y}_{50}]$$

746 
$$Y = [Y_1, Y_2, \dots, Y_{50}]$$

747 with  $Y_i$  denoting the neural activity (high-pass filtered firing rates) for the  $i$ -th trial in the  
 748 training set,  $\bar{Y}_i$  denoting the trial-averaged activity for the condition that the  $i$ -th trial is an  
 749 instantiation of,  $\dagger$  denoting the Moore-Penrose pseudoinverse, and the colon symbol  
 750 designating how to index matrices (e.g.,  $M(:, a:b)$  refers to the submatrix of  $M$  including all  
 751 rows of  $M$ , but only the columns  $a$  through  $b$ ). Lastly, the initial state parameter  $x_0$  was  
 752 computed by taking the average value of the trial-averaged projections over all times and  
 753 conditions. Online inference of the underlying neural state, which yields an estimate  $\hat{x}_t$  at each  
 754 millisecond  $t$ , was computed recursively using the steady-state form of the Kalman filter<sup>49</sup>.

755 After denoising the neural state in the rotational dimensions via the Kalman filter, angular  
 756 momentum was computed in each plane as the cross product between the estimated neural  
 757 state and its derivative, which (up to a constant scaling) can be written

758 
$$L(t) = \begin{bmatrix} L_f(t) \\ L_b(t) \end{bmatrix} = \begin{bmatrix} \hat{x}_{t-1}^{(1)} \hat{x}_t^{(2)} - \hat{x}_t^{(1)} \hat{x}_{t-1}^{(2)} \\ \hat{x}_{t-1}^{(3)} \hat{x}_t^{(4)} - \hat{x}_t^{(3)} \hat{x}_{t-1}^{(4)} \end{bmatrix}$$

759 where the superscript indexes the elements of  $\hat{x}_t$ . We fit 2D Gaussian distributions to these  
 760 angular momentums for each of three behaviors in the training data: ‘stopped’ (speed < .05 Hz),  
 761 ‘pedaling forward’ (velocity > 1 Hz), and ‘pedaling backward’ (velocity < -1 Hz) (**Fig. 5d**).  
 762 Online, the likelihood of the observed angular momentums with respect to each of these three  
 763 distributions dictated the steady-state estimates of direction and speed. We’ll denote these three  
 764 likelihoods  $f_{stop}$ ,  $f_{forward}$ , and  $f_{backward}$ .

765 In general, one can compute which of these three distributions is most likely by choosing the  
 766 maximizing likelihood and assess confidence in that choice by comparing the relative values of  
 767 the three likelihoods. However, we wanted the decoder to err on the side of withholding  
 768 movement. We therefore set a conservative threshold on  $f_{stop}$  corresponding to the point at  
 769 which  $L$  would have a Mahalanobis distance of 3 to the stopped distribution of angular



770 momentums. If  $f_{stop}$  ever exceeded this threshold, we set  $speed_{steady}$  to zero. If this condition  
771 was not met, we decoded direction and speed as follows:

$$772 \quad direction_{steady}(t) = \text{sgn}\left(f_{forward}(t) - f_{backward}(t)\right)$$

$$773 \quad speed_{steady}(t) = \left|2 \cdot \frac{f_{forward}(t)}{f_{forward}(t) + f_{backward}(t)} - 1\right| \beta$$

774 where  $\left|2 \cdot \frac{f_{forward}(t)}{f_{forward}(t) + f_{backward}(t)} - 1\right|$  varies between 0 and 1 depending on the relative sizes of  
775 the likelihoods (yielding a slower velocity if the direction decode is uncertain) and  $\beta$  is a  
776 direction-specific constant learned from the training data whose purpose is simply to scale up  
777 the result to match steady-state cycling speed. In practice,  $speed_{steady}$  was frequently very close  
778 to the monkeys' steady-state cycling speeds (**Fig. 5e**).

#### 779 *Computing initial direction and speed*

780 Initial direction and speed were always computed at the moment the EARLY state was entered,  
781  $t_{early}$ . These values then persisted throughout the remainder of the EARLY state. Given that the  
782 decoder state machine doesn't make use of the initial-direction dimensions prior to entering the  
783 EARLY state,  $t_{early}$  can be computed for the training trials. Single-trial firing rates from the  
784 training set were then projected onto the initial-direction dimensions at  $t_{early}$  and 3D Gaussian  
785 distributions were fit to the resulting sets of forward and backward neural states. Online, firing  
786 rates were projected onto the initial-direction dimensions at  $t_{early}$  and likelihoods  $g_{forward}$  and  
787  $g_{backward}$  were computed with respect to each the learned distributions. If the observed neural  
788 state in the initial-direction subspace was not an outlier ( $>10$  Mahalanobis distance units) with  
789 respect to both distributions, then the initial direction and speed were computed as follows:

$$790 \quad direction_{initial}(t_{early}) = \text{sgn}\left(g_{forward}(t_{early}) - g_{backward}(t_{early})\right)$$

$$791 \quad speed_{initial}(t_{early}) = \left|2 \cdot \frac{g_{forward}(t_{early})}{g_{forward}(t_{early}) + g_{backward}(t_{early})} - 1\right| \beta$$

792 If the observed neural state was an outlier, initial direction and speed were computed in the  
793 same manner as is done in the STEADY state.

#### 794 *Smoothing of decoded velocity*

795 In the primary experiment, the decoder state machine produced an estimate of velocity,  $v_{dec}$ , at  
796 every millisecond. During the STOP and INIT states, this estimate was zero and the monkey's  
797 position in the virtual environment was held constant. During the EARLY and STEADY states,  
798 this estimate was smoothed with a trailing average:

799

$$v'_{dec}(t) = \frac{1}{T_{smooth} + 1} \sum_{i=0}^{T_{smooth}} v_{dec}(t - i)$$

800 where  $T_{smooth} = \min(500, t - t_{early})$ , i.e., the trailing average extended in history up to 500 ms  
801 or to the moment the EARLY state was entered, whichever was shorter.  $v'_{dec}$  was integrated  
802 every millisecond to yield decoded position in the virtual environment. In the speed-tracking  
803 experiment (described below) there was no need to smooth of  $v_{dec}$  prior to integration because  
804 the speed estimate had already been smoothed.

### 805 *Speed-tracking task*

806 In addition to the primary task (where the monkey traveled 2-7 cycles between stationary  
807 targets) we employed a speed-tracking task, in which the monkey was required to match his  
808 virtual speed to an instructed speed. Speed was instructed implicitly, via the relative position of  
809 two moving targets. The primary target was located a fixed distance in front of the monkey's  
810 location in virtual space: the secondary target fell 'behind' the first target when cycling was too  
811 slow, and pulled 'ahead' if cycling was too fast. This separation saturated for large errors, but  
812 for small errors was proportional to the difference between the actual and instructed speed.  
813 This provided sufficient feedback to allow the monkey to track the instructed speed even when  
814 it was changing. Because there was no explicit cue regarding the absolute instructed speed,  
815 monkeys began cycling on each trial unaware of the true instructed speed profile and 'honed in'  
816 on that speed over the first ~2 cycles.

817 We quantify instructed speed not in terms of the speed of translation through the virtual  
818 environment (which has arbitrary units) but in terms of the physical cycling velocity necessary  
819 to achieve the desired virtual speed. E.g., an instructed speed of 2 Hz necessitated cycling at an  
820 angular velocity of 2 Hz to ensure maximal reward. Under BMI control, the output of the  
821 decoder had corresponding units. For example, a 2 Hz angular velocity of the neural trajectory  
822 produced movement at the same speed as 2 Hz physical cycling (see '*Neural features for speed-*  
823 *tracking*' for details of decoder). Reward was given throughout the trial so long as the monkey's  
824 speed was within 0.2 Hz of the instructed speed. We employed both constant and ramping  
825 instructed-speed profiles.

826 Constant profiles were at either 1 Hz or 2 Hz. Trials lasted 20 cycles. After 18 cycles, the primary  
827 and secondary targets (described above) disappeared and were replaced by a final stationary  
828 target two cycles in front of the current position. Speed was not instructed during these last two  
829 cycles; the monkey simply had to continue cycling and stop on the final target to receive a large  
830 reward. Analyses of performance (e.g., **Fig. 8c,d**) were based on the ~16 cycle period starting  
831 when the monkey first honed in on the correct speed (within 0.2 Hz of the instructed speed) and  
832 ending when the speed-instructing cues disappeared 2 cycles before the trial's end.

833 Ramping profiles began with three seconds of constant instructed speed to allow the monkey to  
834 hone in on the correct initial speed. Instructed speed then ramped, over 8 seconds, to a new  
835 value, and remained constant thereafter. As for constant profiles, speed-instructing cues

836 disappeared after 18 cycles and the monkey cycled two further cycles before stopping on a final  
837 target. Again, analyses of performance were based on the period from when the monkey first  
838 honed in on the correct speed, to when the speed-instructing cues disappeared. There were two  
839 ramping profiles: one ramping up from 1 to 2 Hz, and one ramping down from 2 to 1 Hz. There  
840 were thus four total speed profiles (two constant and two ramping). These were performed for  
841 both cycling directions (presented in blocks and instructed by color as in the primary task)  
842 yielding eight total conditions. This task was only performed by monkey G, who completed an  
843 average of 166 trials/session over 2 sessions in manual control and an average of 116  
844 trials/session over 3 sessions in BMI control.

845 As will be described below, the speed decoded during BMI control was low-pass filtered to  
846 remove fluctuations due to noise. This had the potential to actually make the task easier under  
847 BMI control, given that changes in instructed speed were slow within a trial (excepting the  
848 onset and offset of movement). We did not wish to provide BMI control with an ‘unfair’  
849 advantage in comparisons with manual control. We therefore also low-pass filtered virtual  
850 speed while under manual control. Filtering (exponential,  $\tau = 1$  second) was applied only when  
851 speed was above 0.2 Hz, so that movement onset and offset could remain brisk. This aided the  
852 monkey’s efforts to track slowly changing speeds under manual control.

853 During training and while under manual control, trials were failed if there was ever a large  
854 discrepancy between actual and instructed speed. This ensured that monkeys tried their best to  
855 consistently match speed at all times. We relaxed this failure mode under BMI control because  
856 we did not wish to mask large failures in decoded speed. Over the course of single sessions, this  
857 did not discourage monkeys from trying their best, but simply allowed us to observe and  
858 quantify decode failures that would otherwise have resulted in aborted trials. This potentially  
859 puts BMI performance – quantified as in **Figure 8c,d** – at a disadvantage relative to manual  
860 control, where large errors could not persist. In practice this was not an issue as large errors  
861 were rare.

### 862 *Neural features for speed-tracking*

863 Although the speed-tracking experiment leveraged the same dominant neural responses that  
864 were used in the primary experiment, the specific features calculated for the decoder state  
865 machines differed. Details on how the relevant features were calculated in the speed-tracking  
866 experiment are presented in this section.

867 The probability of moving,  $p_{move}$ , was calculated using a different set of parameters for speed-  
868 tracking, largely due to changes in recording quality in the intervening time between data  
869 collection from the primary experiment and data collection for the speed-tracking experiment.  
870 The bin size was increased to 100 ms and the following state transition values were used:  
871  $p_{move|stop} = .0005$  and  $p_{stop|move} = .0005$ . In addition, we observed that the square-root  
872 transform seemed to be having a negligible impact on the quality of the decoder at this bin size,  
873 so we removed it for this task.

874 Several features used in the speed-tracking state machine rely on neural activity in the  
875 rotational dimensions. In the primary experiment, this activity was high-pass filtered (cutoff  
876 frequency: 1 Hz) prior to projection into these dimensions, which helped isolate the rotational  
877 neural trajectories during ~2 Hz cycling. For speed-tracking, we wanted to accommodate a  
878 broader range of cycling speeds (which corresponded to a broader range of periodicities in the  
879 rotational neural trajectories). Thus, we dropped the cutoff frequency from 1 Hz to 0.75 Hz for  
880 this experiment.

881 In computing  $direction_{steady}$ , the same computations were performed as for the primary-  
882 experiment, with one exception: a new direction was not necessarily decoded every millisecond.  
883 In order to decode a new direction, the follow conditions needed to be met: 1) the observed  
884 angular momentums had a Mahalanobis distance of less than 4 to the distribution  
885 corresponding to the decoded direction, 2) the observed angular momentums had a  
886 Mahalanobis distance of greater than 6 to the distribution corresponding to the opposite  
887 direction. These criteria ensured that a new steady-state direction was only decoded when the  
888 angular momentums were highly consistent with a particular direction. When these criteria  
889 were not met, the decoder continued to decode the same direction from the previous time step.

890 Speed was computed identically in the EARLY and STEADY states by decoding directly from  
891 the rotational plane corresponding to the decoded direction. A coarse estimate of speed was  
892 calculated as the derivative of the phase of rotation follows:

$$893 \quad \theta'(t) = \begin{cases} \frac{d\theta_f}{dt}, & direction(t) = +1 \\ \frac{d\theta_b}{dt}, & direction(t) = -1 \end{cases}$$

894 where  $\theta_f(t)$  and  $\theta_b(t)$  are the phases of the two planes in the neural state estimate  $\hat{x}_t$ ,  $direction$   
895 corresponds to  $direction_{early}$  while in the EARLY state and  $direction_{steady}$  while in the  
896 STEADY state, and the derivative  $\theta'$  is computed in units of Hz. The coarse speed estimate,  $\theta'$ ,  
897 was then smoothed with an exponential moving average ( $\tau = 500$  ms) to generate  $speed$ , the  
898 variable that gets used in the decoder state machine. Additional saturation limits were set such  
899 that  $speed$  never dropped below 0.5 Hz or exceeded 3.5 Hz, so as to remain in the range  
900 typically seen during pedaling. On entry into EARLY or STEADY from either INIT or EXIT,  
901 when  $speed$  gets initialized, the output of this exponential moving average was reset to an  
902 initial value of 1.5 Hz, which was the average starting speed across conditions.

903 Lastly, there were two new conditions for decoder state transitions in the speed-tracking  
904 experiment (**Supp. Fig. 1**). First, transitions from INIT to EARLY required that a condition  
905 termed “confident initial direction decode” was obtained. This condition was met when the  
906 Mahalanobis distance from the neural state in the initial-direction subspace to either the  
907 forward or backward distributions dropped below 4. Second, transitions into the EXIT state  
908 required (in addition to a drop in  $p_{move}$ ) that the observed angular momentums,  $L$ , belong to a

909 set termed ‘Stationary’. This set was defined as all  $L$  with a Mahalanobis distance of less than 4  
910 to the ‘stopped’ distribution of angular momentums, which was learned from the training set.

911

## 912 **Acknowledgements**

913 We thank Y. Pavlova for expert animal care, A. Russo for sharing code and data for preliminary  
914 analysis, and E. Oby for surgical expertise and assistance. This work was supported by NINDS  
915 1DP2NS083037, NIH CRCNS R01NS100066, NINDS 1U19NS104649, the Simons Foundation  
916 (SCGB#325233 and SCGB#542957), the Grossman Center for the Statistics of Mind, the  
917 McKnight Foundation, P30 EY019007, a Klingenstein-Simons Fellowship, and the Searle  
918 Scholars Program.

919

## 920 **Author Contributions**

921 M.M.C. conceived the study. K.E.S., S.M.P., and M.M.C. designed experiments. S.M.P., K.E.S.,  
922 M.M.C., and Q.W. created the decoding algorithms. K.E.S. and S.M.P. collected and analyzed  
923 datasets. K.E.S., S.M.P., and M.M.C. wrote the paper. All authors contributed to editing.

924

## 925 **References**

1. Gilja, V. *et al.* A high-performance neural prosthesis enabled by control algorithm design. *Nat. Neurosci.* **15**, 1752–1757 (2012).
2. Gilja, V. *et al.* Clinical translation of a high-performance neural prosthesis. *Nat. Med.* **21**, 1142–1145 (2015).
3. Shanechi, M. M. *et al.* Rapid control and feedback rates enhance neuroprosthetic control. *Nat. Commun.* **8**, 13825 (2017).
4. Shenoy, K. V. & Carmena, J. M. Combining Decoder Design and Neural Adaptation in Brain-Machine Interfaces. *Neuron* **84**, 665–680 (2014).
5. Ajilboye, A. B. *et al.* Restoration of reaching and grasping movements through brain-controlled muscle stimulation in a person with tetraplegia: a proof-of-concept demonstration. *The Lancet* **0**, (2017).
6. Ethier, C., Oby, E. R., Bauman, M. J. & Miller, L. E. Restoration of grasp following paralysis through brain-controlled stimulation of muscles. *Nature* **485**, 368–371 (2012).
7. Collinger, J. L. *et al.* 7 degree-of-freedom neuroprosthetic control by an individual with tetraplegia. *Lancet* **381**, 557–564 (2013).
8. Wodlinger, B. *et al.* Ten-dimensional anthropomorphic arm control in a human brain-machine interface: difficulties, solutions, and limitations. *J. Neural Eng.* **12**, 016011 (2015).
9. Rajangam, S. *et al.* Wireless Cortical Brain-Machine Interface for Whole-Body Navigation in Primates. *Sci. Rep.* **6**, (2016).
10. Libedinsky, C. *et al.* Independent Mobility Achieved through a Wireless Brain-Machine Interface. *PLOS ONE* **11**, e0165773 (2016).
11. Velliste, M., Perel, S., Spalding, M. C., Whitford, A. S. & Schwartz, A. B. Cortical control of a prosthetic arm for self-feeding. *Nature* **453**, 1098–1101 (2008).
12. Chapin, J. K., Moxon, K. A., Markowitz, R. S. & Nicolelis, M. A. L. Real-time control of a robot arm using simultaneously recorded neurons in the motor cortex. *Nat. Neurosci.* **2**, 664–670 (1999).
13. Wessberg, J. *et al.* Real-time prediction of hand trajectory by ensembles of cortical neurons in primates. *Nature* **408**, 361–365 (2000).

14. Carmena, J. M. *et al.* Learning to Control a Brain–Machine Interface for Reaching and Grasping by Primates. *PLoS Biol* **1**, e42 (2003).
15. Taylor, D. M., Tillery, S. I. H. & Schwartz, A. B. Direct Cortical Control of 3D Neuroprosthetic Devices. *Science* **296**, 1829–1832 (2002).
16. Serruya, M. D., Hatsopoulos, N. G., Paninski, L., Fellows, M. R. & Donoghue, J. P. Brain-machine interface: Instant neural control of a movement signal. *Nature* **416**, 141–142 (2002).
17. Scott, S. H., Gribble, P. L., Graham, K. M. & Cabel, D. W. Dissociation between hand motion and population vectors from neural activity in motor cortex. *Nature* **413**, 161–165 (2001).
18. Russo, A. A. *et al.* Motor Cortex Embeds Muscle-like Commands in an Untangled Population Response. *Neuron* **97**, 953–966.e8 (2018).
19. Churchland, M. M. *et al.* Neural population dynamics during reaching. *Nature* **487**, 51–56 (2012).
20. Michaels, J. A., Dann, B. & Scherberger, H. Neural Population Dynamics during Reaching Are Better Explained by a Dynamical System than Representational Tuning. *PLOS Comput. Biol.* **12**, e1005175 (2016).
21. Shenoy, K. V., Sahani, M. & Churchland, M. M. Cortical control of arm movements: A dynamical systems perspective. *Annu. Rev. Neurosci.* **36**, 337–359 (2013).
22. Sussillo, D., Churchland, M. M., Kaufman, M. T. & Shenoy, K. V. A neural network that finds a naturalistic solution for the production of muscle activity. *Nat. Neurosci.* **18**, 1025–1033 (2015).
23. Kao, J. C. *et al.* Single-trial dynamics of motor cortex and their applications to brain-machine interfaces. *Nat. Commun.* **6**, 1–12 (2015).
24. Aghagolzadeh, M. & Truccolo, W. Inference and Decoding of Motor Cortex Low-Dimensional Dynamics via Latent State-Space Models. *IEEE Trans. Neural Syst. Rehabil. Eng.* **24**, 272–282 (2016).
25. Makin, J. G., O’Doherty, J. E., Cardoso, M. M. B. & Sabes, P. N. Superior arm-movement decoding from cortex with a new, unsupervised-learning algorithm. *J. Neural Eng.* **15**, 026010 (2018).
26. Wu, W., Gao, Y., Bienenstock, E., Donoghue, J. P. & Black, M. J. Bayesian Population Decoding of Motor Cortical Activity Using a Kalman Filter. *Neural Comput.* **18**, 80–118 (2006).
27. Foster, J. D. *et al.* A freely-moving monkey treadmill model. *J. Neural Eng.* **11**, 046020 (2014).
28. Fetz, E. E., Finocchio, D. V., Baker, M. A. & Soso, M. J. Sensory and motor responses of precentral cortex cells during comparable passive and active joint movements. *J. Neurophysiol.* **43**, 1070–1089 (1980).
29. Lemon, R. N., Hanby, J. A. & Porter, R. Relationship between the activity of precentral neurones during active and passive movements in conscious monkeys. *Proc. R. Soc. Lond. B Biol. Sci.* **194**, 341–373 (1976).
30. Suminski, A. J., Tkach, D. C. & Hatsopoulos, N. G. Exploiting multiple sensory modalities in brain-machine interfaces. *Neural Netw.* **22**, 1224–1234 (2009).
31. Schroeder, K. E. *et al.* Robust tactile sensory responses in finger area of primate motor cortex relevant to prosthetic control. *J. Neural Eng.* **14**, 046016 (2017).
32. Pruszynski, J. A. *et al.* Primary motor cortex underlies multi-joint integration for fast feedback control. *Nature* **478**, 387–390 (2011).
33. Christie, B. P. *et al.* Comparison of spike sorting and thresholding of voltage waveforms for intracortical brain–machine interface performance. *J. Neural Eng.* **12**, 016009 (2014).
34. Moran, D. W. & Schwartz, A. B. Motor Cortical Representation of Speed and Direction During Reaching. *J. Neurophysiol.* **82**, 2676–2692 (1999).
35. Georgopoulos, A. P., Schwartz, A. B. & Kettner, R. E. Neuronal population coding of movement direction. *Science* **233**, 1416–1419 (1986).
36. Kaufman, M. T. *et al.* The Largest Response Component in the Motor Cortex Reflects Movement Timing but Not Movement Type. *eNeuro* **3**, (2016).

37. Kemere, C. *et al.* Detecting Neural-State Transitions Using Hidden Markov Models for Motor Cortical Prostheses. *J. Neurophysiol.* **100**, 2441–2452 (2008).
38. Kao, J. C., Nuyujukian, P., Ryu, S. I. & Shenoy, K. V. A High-Performance Neural Prosthesis Incorporating Discrete State Selection With Hidden Markov Models. *IEEE Trans. Biomed. Eng.* **64**, 935–945 (2017).
39. Ethier, C., Sachs, N. A. & Miller, L. E. Continuous state-dependent decoders for brain machine interfaces. in *2011 5th International IEEE/EMBS Conference on Neural Engineering* 473–477 (2011). doi:10.1109/NER.2011.5910589.
40. Kao, J. C., Ryu, S. I. & Shenoy, K. V. Leveraging neural dynamics to extend functional lifetime of brain-machine interfaces. *Sci. Rep.* **7**, (2017).
41. Gallego, J. A., Perich, M. G., Chowdhury, R. H., Solla, S. A. & Miller, L. E. Long-term stability of cortical population dynamics underlying consistent behavior. *Nat. Neurosci.* **23**, 260–270 (2020).
42. Xing, D., Aghagolzadeh, M., Truccolo, W. & Borton, D. Low-Dimensional Motor Cortex Dynamics Preserve Kinematics Information During Unconstrained Locomotion in Nonhuman Primates. *Front. Neurosci.* **13**, (2019).
43. Santhanam, G., Ryu, S. I., Yu, B. M., Afshar, A. & Shenoy, K. V. A high-performance brain-computer interface. *Nature* **442**, 195–198 (2006).
44. Sadtler, P. T., Ryu, S. I., Tyler-Kabara, E. C., Yu, B. M. & Batista, A. P. Brain-computer interface control along instructed paths. *J. Neural Eng.* **12**, 016015 (2015).
45. Nuyujukian, P., Kao, J. C., Ryu, S. I. & Shenoy, K. V. A Nonhuman Primate Brain-Computer Typing Interface. *Proc. IEEE* **105**, 66–72 (2017).
46. Fernández-Rodríguez, Á., Velasco-Álvarez, F. & Ron-Angevin, R. Review of real brain-controlled wheelchairs. *J. Neural Eng.* **13**, 061001 (2016).
47. Thacker, N. A. & Bromiley, P. A. *The Effects of a Square Root Transform on a Poisson Distributed Quantity*. Technical Report <http://www.tina-vision.net/tina-knoppix/tina-memo/2001-010.pdf> (2001).
48. Cunningham, J. P. & Ghahramani, Z. Linear Dimensionality Reduction: Survey, Insights, and Generalizations. *J Mach Learn Res* **16**, 2859–2900 (2015).
49. Malik, W. Q., Truccolo, W., Brown, E. N. & Hochberg, L. R. Efficient Decoding With Steady-State Kalman Filter in Neural Interface Systems. *IEEE Trans. Neural Syst. Rehabil. Eng.* **19**, 25–34 (2011).

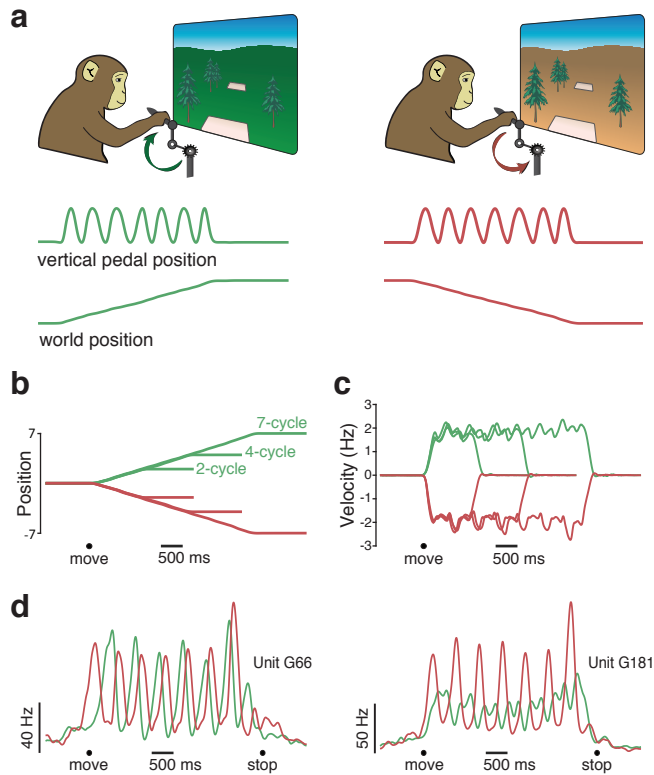

**Figure 1. A cycling task that elicits rhythmic movements.** (a) Monkeys rotated a hand-held pedal forward (*left*, cued by a green background) or backward (*right*, cued by a tan background) to progress through a virtual environment. Traces at bottom plot pedal kinematics (vertical position) and the resulting virtual world position for two example manual-control trials. On both of these trials (one forward and one backward) the monkey progressed from one target to another by cycling seven cycles. (b) Trial-averaged virtual position from a typical manual-control session. Each trace plots the change in virtual position (from a starting position of zero) for one of six conditions: forward or backward for 2, 4, or 7 cycles. Black circle indicates the time of movement onset. Trials were averaged after being aligned to movement onset, and then scaled such that the duration of each trial matched the average duration for that condition. (c) Trial-averaged pedal rotational velocity from the same session, for the same six conditions. (d) Firing rates of two example units. Trial-averaged firing rates (computed after temporally aligning trials) are shown for two conditions: forward (*green*) and backward (*red*) for seven cycles. Black circles indicate the timing of movement onset and offset.



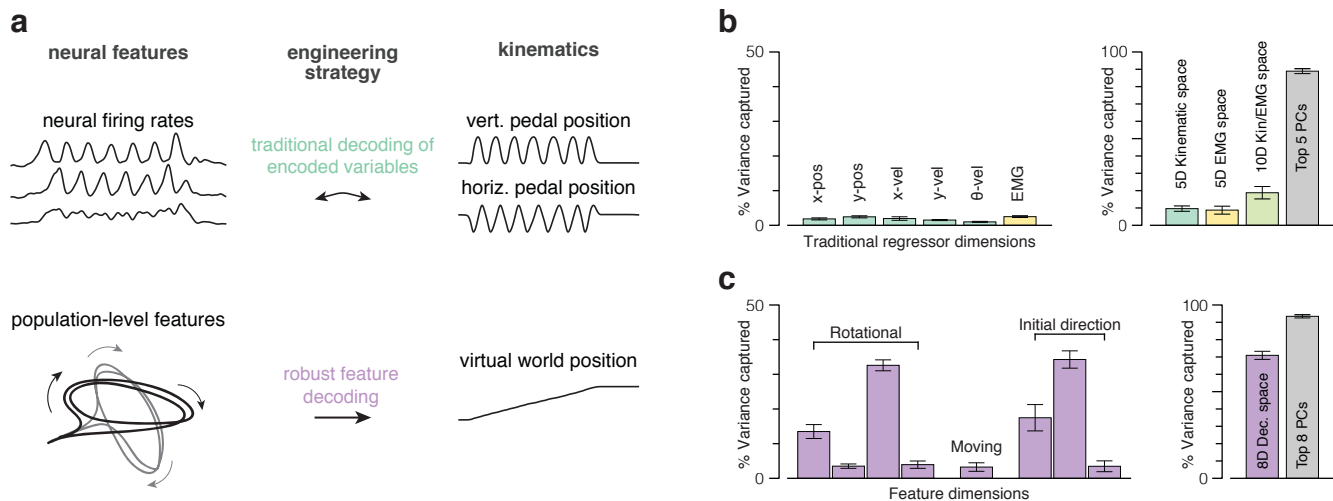

**Figure 2. Different decode strategies leverage neural signals with different magnitudes. (a)**

Two possible decoding strategies. In the first (*top*) neural firing rates are assumed to predominantly encode the key variables. The encoding model is usually assumed to be roughly linear when variables are expressed appropriately. For example, cosine tuning for reach velocity is equivalent to a linear dependence on horizontal and vertical velocity. The goal of decoding is to invert encoding. Thus, decoding dimensions should capture the dominant signals in the neural data (because those are what is encoded). The second strategy (*bottom*) can be applied even if the dominant signals do not have the goal of encoding. This strategy seeks to find neural response features that have a robust relationship with the variable one wishes to decode. That relationship may be complex or even incidental, but is useful if it involves high-variance response features. **(b)** Variance of the neural population response captured by dimensions used to decode kinematic parameters (*green bars*) and muscle activity (*yellow bar*). Data are from three manual-control sessions where units (192 channels per day) and muscles (5-7 channels per day) were recorded simultaneously. Each bar plots the average and standard error across sessions (unless otherwise specified). *Left subpanel*: variance captured for kinematic variables (individual variables shown separately) and muscles (average across 19 recordings, standard error computed across recordings). *Right subpanel*: total variance captured by subspaces spanned by kinematic-decoding dimensions, muscle-decoding dimensions, or both. (These are not the sum of the individual variances as dimensions were not always orthogonal). We had different numbers of EMG recordings per day and thus always selected a subset of five. Variance captured by the top five principal components is shown for comparison. **(c)** Similar plot but for the dimensions upon which our decoder was built. *Left subpanel*: variance captured for each of these eight dimensions. *Right subpanel*: variance captured by the eight-dimensional subspace spanned by those dimensions. Variance captured by the top eight principal components is shown for comparison.

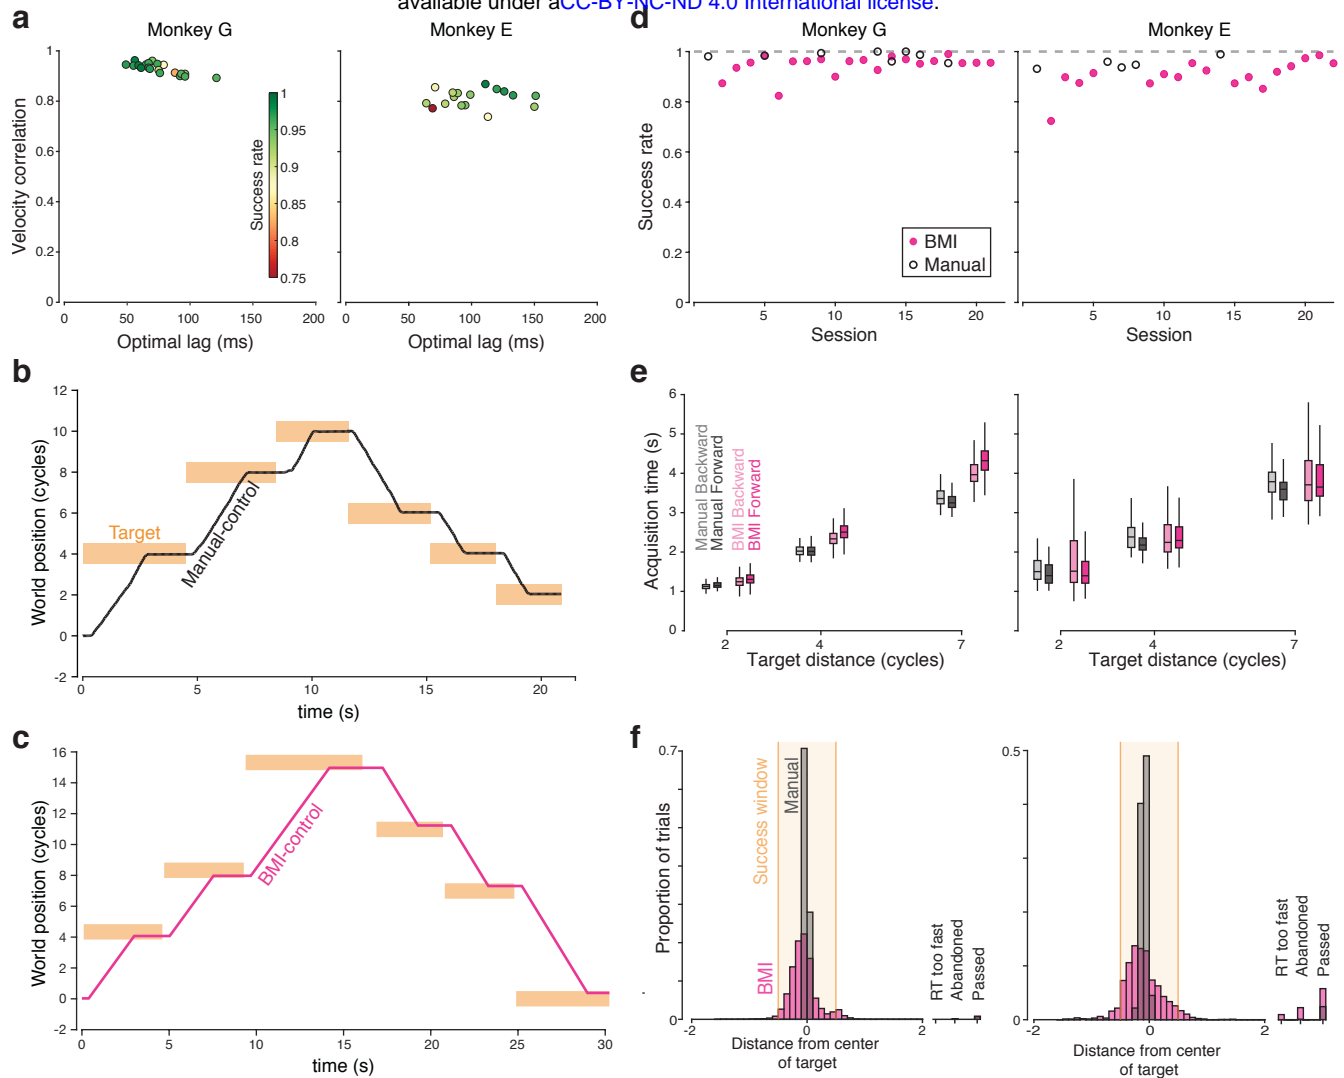

**Figure 3. Decoder performance.** (a) Summary of the cross-correlation between decoded virtual velocity under BMI control, and the virtual velocity that would have been produced by the pedal (which monkeys continued to manipulate normally). Each symbol corresponds to one BMI-control session, and plots the peak of the cross-correlation versus the lag where that peak occurred. Colors indicate success rate during that session. (b) Example manual-control performance for six consecutive trials, 3 forward and 3 backward. World position is expressed in terms of the number of cycles of the pedal needed to move that distance. For plotting purposes, the position at the beginning of this stretch of behavior was set to zero. Bars indicate the time that targets turned on and off (horizontal span) and the size of the acceptance window (vertical span). (c) Similar plot during BMI control. For ease of comparison, world position is still expressed in terms of the number of physical cycles that would be needed to travel that far, although physical cycling no longer had any impact on virtual velocity. (d) Success rate for both monkeys. Each symbol plots, for one session, the proportion of trials where the monkey successfully moved from the initial target to the final target, stopped within it, and remained stationary until reward delivery. Dashed line at 1 for reference. (e) Target acquisition times for successful trials. Center lines indicate median, the box edges indicate the first and third quartiles, and the whiskers include all non-outlier points (points less than 1.5 times the interquartile range from the box edges). Data are shown separately for the three target distances. (f) Histograms of stopping location from both monkeys. Analysis considers both successful and failed trials. The bar at far right indicates the proportion of trials where the monkey failed for reasons other than stopping accuracy per se. This included trials where monkeys disrespected the reaction time limits, abandoned the trial before approaching the target, or passed through the target without stopping.

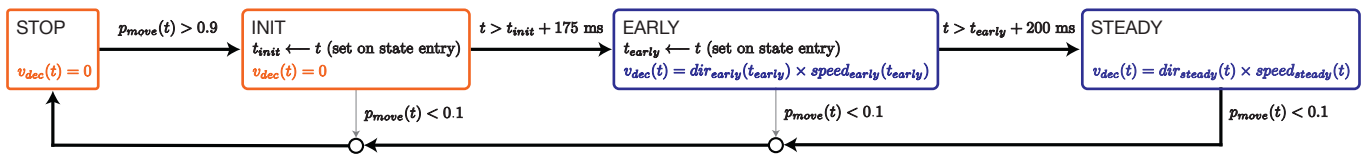

**Figure 4. State machine diagram.** BMI motion was determined by a state machine with four states: STOP, INIT, EARLY, and STEADY, corresponding to the different stages of a typical trial. The output of the state machine at every millisecond was an estimate of decoded velocity through the virtual environment,  $v_{dec}$  which was then smoothed and integrated to compute virtual position. Black arrows indicate the typical path of a successful BMI trial and gray arrows indicate all other possible transitions. State transitions were governed by activity in the moving-sensitive dimension, which was translated into a probability of moving,  $p_{move}$ . While  $p_{move}$  was low, the STOP state was active and decoded velocity was set to zero. When  $p_{move}$  became high, the INIT state was entered but decoded velocity remained zero. If  $p_{move}$  remained high for 175 ms, the EARLY state was entered and velocity was decoded using the initial-direction dimensions. After another 200 ms, the STEADY state was entered and decoded velocity depended on the neural state in the rotational dimensions. If  $p_{move}$  dropped below 0.1 at any point, STOP was reentered. States in which progress is made through the virtual environment are highlighted in blue and states in which BMI motion is held at zero are highlighted in orange.

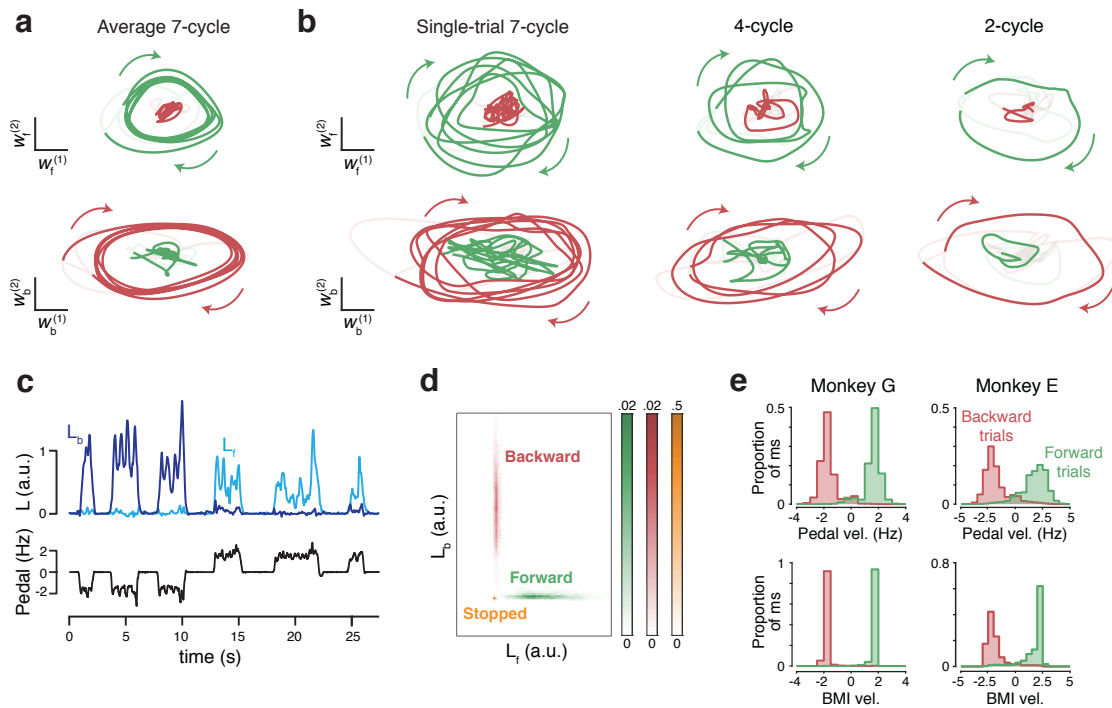

**Figure 5. Leveraging rotational trajectories to decode velocity.** (a) Trial-averaged population activity, during a manual-control block, projected onto the forward (*top*) and backward (*bottom*) rotational planes. Data are from seven-cycle forward (*green*) and backward (*red*) conditions. By design, the forward plane primarily captures rotational trajectories during forward cycling, and vice versa. Boldly colored portions of each trace highlight rotations during the middle cycles (a period that excludes the first and last half cycle of each movement). Colored arrows indicate rotation direction. Light portion of each trace corresponds to the rest of the trial. In addition to smoothing with a causal filter, neural data have been high-pass filtered to match what was used during BMI control. Data are from monkey G. (b) As in panel (a), but for three example single trials, one for each of the three distances. (c) Example angular momentum ( $L$ ) in the backward plane (*dark blue*) and forward plane (*bright blue*) during six trials of BMI control. Velocity of the pedal is shown in black. Although the pedal was disconnected, this provides a useful indication of how the monkey was intending to move. Data are from the same day shown in panels a and b. (d) Probability densities of angular momenta found from the training dataset collected on the same day. (e) Histograms of BMI-control velocity (*bottom*) and (disconnected) pedal velocity (*top*) for all times the decoder was in the STEADY state, across all BMI-control sessions.

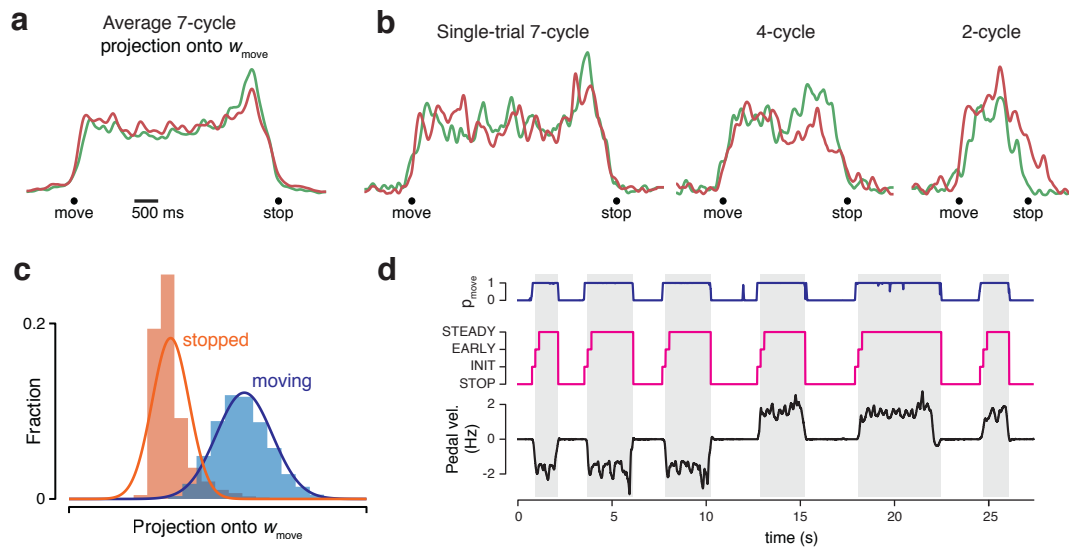

**Figure 6. Leveraging the moving-sensitive dimension to infer probability of moving. (a)**

Trial-averaged population activity, during a manual-control block, projected onto the moving-sensitive dimension (same session and trials as Figure 5a). **(b)** As in panel (a), but for three example single trials (same trials as in Figure 5b). **(c)** Histogram of the neural state projected onto the moving-sensitive dimension for training data. The neural state was measured every ten milliseconds, at times when the monkey was stopped within a target (*orange*) or actively cycling (*blue*). Traces show Gaussian fits used to compute  $p_{move}$ . **(d)** Example time-course, during BMI control, of  $p_{move}$  (*blue*) and the active state (*magenta*). Gray regions show times when the decoder produced virtual movement (i.e., when in EARLY or STEADY). These times corresponded well to times when the monkey was intending to move, as indicated by the angular velocity of the disconnected pedal (*black*). Note also that transient inappropriate spikes in  $p_{move}$  (as seen here around 18 s) do not lead to false starts because either they don't exceed 0.9, as was the case here, or they are too brief and the EARLY state is never reached. Same example data as in Figure 5c.

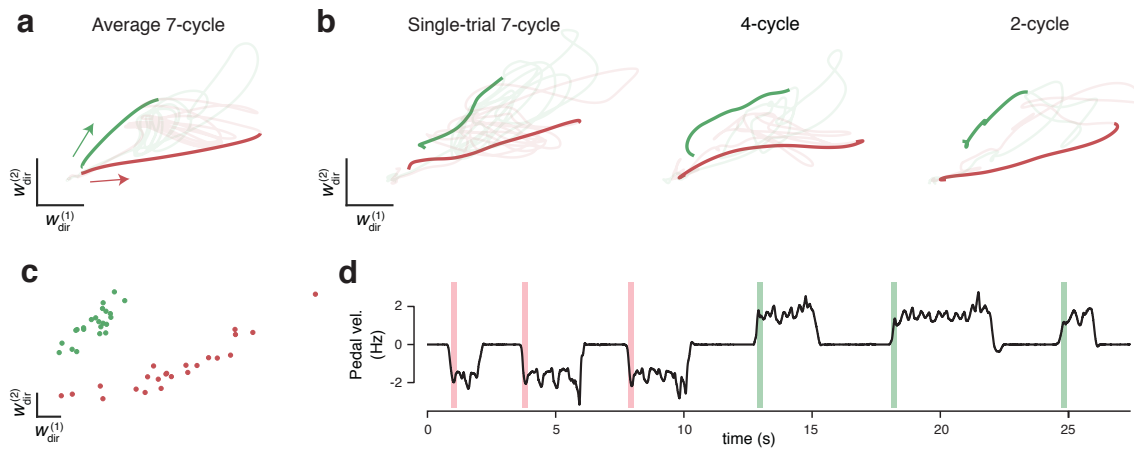

**Figure 7. Leveraging initial-direction dimensions to allow low-latency decoding.** (a) Trial-averaged population activity, during a manual-control block, projected onto two (of three) initial-direction dimensions (same session and trials as Figure 5a and 6a). Boldly colored portions of traces highlight -200 ms to +175 ms relative to physical move onset. Arrows indicate direction of trajectories. (b) As in panel (a), but for three example single trials (same trials as in Figure 5b and 6b). (c) The location of the neural state, for training data, at the time the state-machine (applied post-hoc to that training data) entered the EARLY state. This data (50 total trials) was used to fit two Gaussian distributions. During BMI control, when the EARLY state was entered, virtual direction was determined by which distribution maximized the data likelihood. (d) Example of initial-direction decoding during BMI control. Colored windows show the times in the EARLY state, with red and green indicating decoded direction. Same example data as in Figure 5c and 6d.

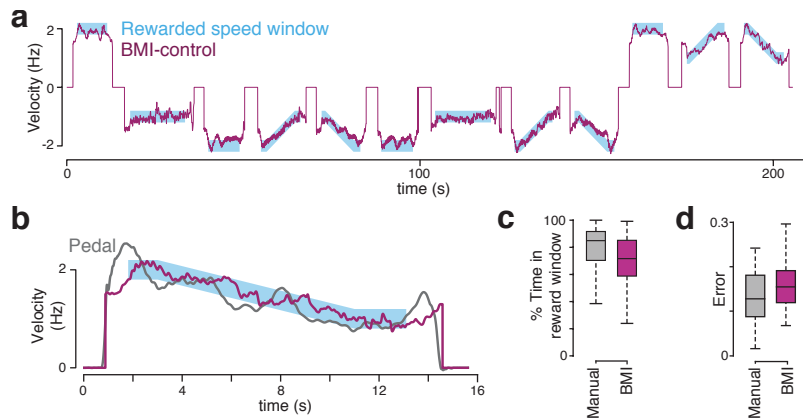

**Figure 8. Performance in the modified task requiring speed tracking. (a)** Instructed velocity and BMI-decoded virtual velocity during 12 contiguous trials of BMI control. **(b)** Expanded view of one example trial (the last trial from panel a). The virtual velocity that would have been produced by the pedal is shown in gray for comparison. **(c)** Percentage of time spent in rewarded velocity window for trials in manual-control (2 sessions, 333 trials) and BMI-control (3 sessions, 349 trials). Center lines indicate median, the box edges indicate the first and third quartiles, and the whiskers include all non-outlier points (points less than 1.5 times the interquartile range from the box edges). **(d)** Mean absolute error (MAE) between instructed velocity and virtual velocity for both manual control and BMI control sessions. One mean error was computed per trial. Same format as (c).
